1 **Portrait of a generalist bacterium: pathoadaptation, metabolic specialization and extreme**  
2 **environments shape diversity of *Staphylococcus saprophyticus***

3  
4 Madison A. Youngblom<sup>1,2</sup>, Madeline R. Imhoff<sup>2</sup>, Lilia M. Smyth<sup>2</sup>, Mohamed A. Mohamed<sup>2</sup>, Caitlin S.  
5 Pepperell<sup>2,3#</sup>

6  
7 <sup>1</sup> Microbiology Doctoral Training Program, University of Wisconsin-Madison, Wisconsin, USA

8 <sup>2</sup> Department of Medical Microbiology and Immunology, School of Medicine and Public Health, University of  
9 Madison-Wisconsin, Wisconsin, USA

10 <sup>3</sup> Department of Medicine (Infectious Diseases), School of Medicine and Public Health, University of Wisconsin-  
11 Madison, Wisconsin, USA

12  
13 Running title: Comparative genomics of *Staphylococcus saprophyticus*

14 #Address correspondence to [cspepper@medicine.wisc.edu](mailto:cspepper@medicine.wisc.edu)

15  
16 **Author contributions**

17 MAY – conceptualization, data curation, methodology-bioinformatics, investigation-bioinformatics,  
18 formal analysis, visualization, writing-original draft & revision

19 MRI – methodology-wet lab, investigation-wet lab, writing-revision

20 LMS – investigation-bioinformatics, writing-revision

21 MAM – investigation-bioinformatics, writing-revision

22 CSP – conceptualization, supervision, writing-draft & revision

23  
24 **Abstract**

25 *Staphylococcus saprophyticus* is a Gram-positive, coagulase-negative staphylococcus found in diverse  
26 environments including soil and freshwater, meat, and dairy foods. *S. saprophyticus* is also an  
27 important cause of urinary tract infections (UTIs) in humans, and mastitis in cattle. However, the genetic  
28 determinants of virulence have not yet been identified, and it remains unclear whether there are distinct  
29 sub-populations adapted to human and animal hosts. Using a diverse sample of *S. saprophyticus*  
30 isolates from food, animals, environmental sources, and human infections, we characterized the  
31 population structure and diversity of global populations of *S. saprophyticus*. We found that divergence  
32 of the two major clades of *S. saprophyticus* is likely facilitated by barriers to horizontal gene transfer  
33 (HGT) and differences in metabolism. Using genome-wide association study (GWAS) tools we  
34 identified the first Type VII secretion system (T7SS) described in *S. saprophyticus* and its association  
35 with bovine mastitis. Finally, we found that in general, strains of *S. saprophyticus* from different niches  
36 are genetically similar with the exception of built environments, which function as a 'sink' for *S.*

37 *saprophyticus* populations. This work increases our understanding of the ecology of *S. saprophyticus*  
38 and of the genomics of bacterial generalists.

39

#### 40 **Data summary**

41 Raw sequencing data for newly sequenced *S. saprophyticus* isolates have been deposited to the NCBI  
42 SRA under the project accession PRJNA928770. A list of all genomes used in this work and their  
43 associated metadata are available in the supplementary material. Custom scripts used in the  
44 comparative genomics and GWAS analyses are available here:

45 [https://github.com/myoungblom/sapro\\_genomics](https://github.com/myoungblom/sapro_genomics).

46

#### 47 **Impact statement**

48 It is not known whether human and cattle diseases caused by *S. saprophyticus* represent spillover  
49 events from a generalist adapted to survive in a range of environments, or whether the capacity to  
50 cause disease represents a specific adaptation. Seasonal cycles of *S. saprophyticus* UTIs and  
51 molecular epidemiological evidence suggest that these infections may be environmentally-acquired  
52 rather than via transmission from person to person. Using comparative genomics and genome wide  
53 association study tools, we found that *S. saprophyticus* appears adapted to inhabit a wide range of  
54 environments (generalist), with isolates from animals, food, natural environments and human infections  
55 being closely related. Bacteria that routinely switch environments, particularly between humans and  
56 animals, are of particular concern when it comes to the spread of antibiotic resistance from farm  
57 environments into human populations. This work provides a framework for comparative genomic  
58 analyses of bacterial generalists and furthers our understanding of how bacterial populations move  
59 between humans, animals, and the environment.

## 60 Introduction

61 *Staphylococcus saprophyticus* is a Gram-positive, coagulase-negative staphylococcus (CNS) that is a  
62 major cause of urinary tract infections (UTIs) in reproductive aged women (1). *S. saprophyticus* is also  
63 found in a wide variety of other niches including natural environments like soil, fresh and salt water (2,  
64 3). *S. saprophyticus* colonizes and infects animals (4, 5) where it can cause bovine mastitis (6), and is  
65 found in food processing environments and animal food products (7–10). Despite its relevance to  
66 human and animal health, little is known about the factors – host and bacterial – that influence *S.*  
67 *saprophyticus* infections.

68

69 Previous genomic studies have shown that bacterial isolates from different sources are intermingled on  
70 the phylogeny (10–12). Prior to the widespread use of whole-genome sequencing (WGS), pulsed field  
71 gel-electrophoresis (PFGE) genotyping of *S. saprophyticus* isolates causing UTIs showed that diverse  
72 strain types can cause infection in humans (13, 14). Genomic surveys of putative virulence factors in *S.*  
73 *saprophyticus* from different sources show similar distributions of putative virulence genes, particularly  
74 adhesins that enable colonization of the human urinary tract (15, 16). A recent genomics study showed  
75 that *S. saprophyticus* from meat processing plants have high genetic relatedness to human UTI isolates  
76 from surrounding communities (10). These results demonstrate that diverse *S. saprophyticus* strains  
77 cause disease in humans, and prior studies have failed to identify virulence factors or transmission  
78 barriers that separate pathogenic from non-pathogenic strains. Thus, it is not clear whether sub-  
79 populations of *S. saprophyticus* are specifically adapted to cause disease, or more generally, if sub-  
80 populations of *S. saprophyticus* are uniquely adapted to the various niches they inhabit.

81

82 In order to address this knowledge gap, we performed genome wide association studies (GWAS) of the  
83 largest and most diverse sample of *S. saprophyticus* genomes analyzed to date. We used comparative  
84 genomics to characterize the diversity and population structure of *S. saprophyticus* and revealed  
85 genetic and ecological factors driving divergence between the two major clades of *S. saprophyticus*.  
86 GWAS investigations of genomic signatures of host and niche adaptation show that the majority of *S.*  
87 *saprophyticus* isolates appear to be generalists moving freely between environments. We identified  
88 exceptions to genomic generalism among bacteria inhabiting built environments and those causing  
89 bovine mastitis.

90

91

92

93

94 **Results**

95 Combining newly sequenced isolates as well as all data publicly available at the time of analysis, we  
96 produced a sample of 780 *Staphylococcus saprophyticus* genomes. Genomes were categorized by  
97 isolation source into the following groups (see Methods): animal, built environment, food, human, and  
98 natural environment (Supplementary Data 1).

99

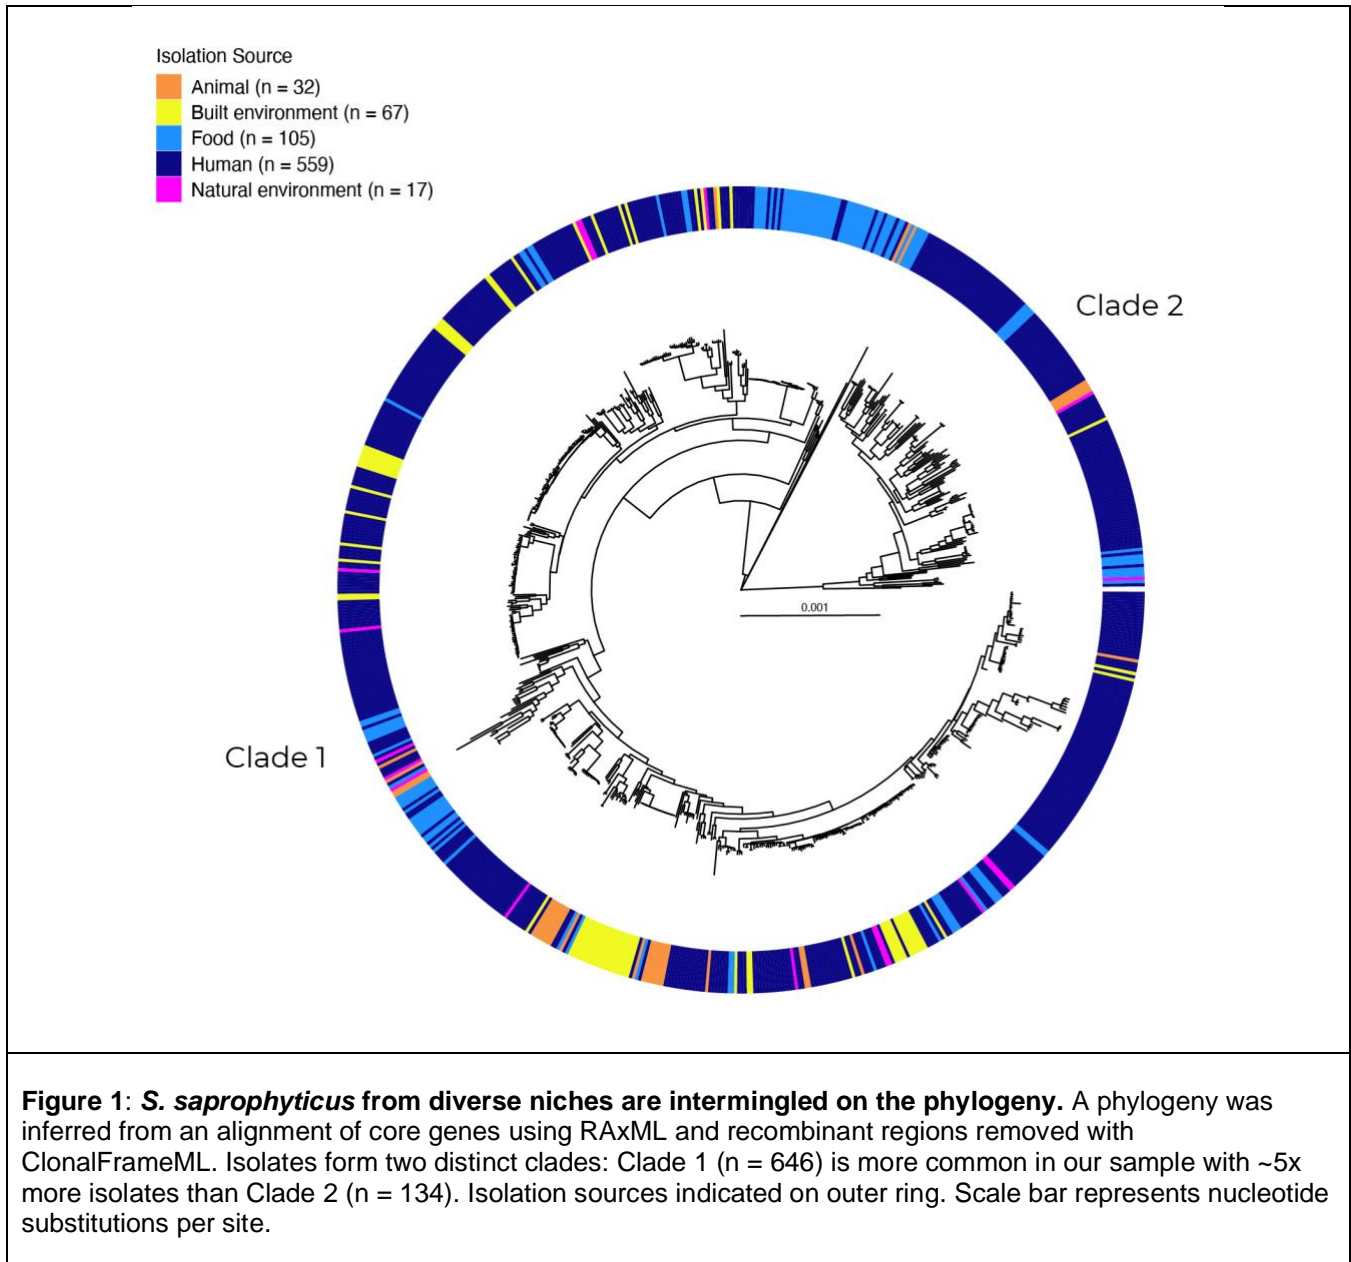

100

101

102

103 *Diversity among S. saprophyticus populations*

104 A phylogeny inferred from an alignment of core genome sequences shows that isolates from diverse  
105 sources are closely related, with no evidence of a particular sub-population or phylogenetic lineage  
106 being adapted to a single niche (Figure 1). This contrasts with other bacterial species with multiple  
107 niches where adaptation to a particular host or environment is more obvious and specific lineages are  
108 associated with specific hosts, as is the case for *Staphylococcus aureus* (17). The lack of geographic  
109 and temporal structure on the phylogeny was striking, with examples of bacteria from different  
110 continents and/or isolated decades apart being very closely related (Figure S1). For example, one  
111 strain from the Washington state Pacific Ocean isolated in 2008 is separated by only 47 core genome  
112 SNPs (5e-5 SNPs per site) from a strain isolated from a Norwegian bathroom in 2021 (Figure S1).

113

114 Among an average of 2,461 genes per genome, 85% of genes in each isolate are core genes, with  
115 15% categorized as accessory genes (Table S1). We found that despite the high proportion of core  
116 genes in each genome, isolates in our sample showed extremely high diversity in accessory gene  
117 content: the pangenome is made up of ~14,000 genes, 80% of which are present in less than 15% of  
118 isolates in our sample (Table S1). This indicates that although a high proportion of the *S. saprophyticus*  
119 genome is conserved within the species, the remaining gene content is made up of largely unique  
120 genes, likely acquired from other species via horizontal gene transfer (HGT).

121

122 To investigate the role of HGT in shaping *S. saprophyticus* populations we used ClonalFrameML (18) to  
123 infer recombinant fragments within the core genome and calculate the relative contributions of  
124 recombination and mutation to observed genetic diversity ( $r/m$ ). We found that *S. saprophyticus* has an  
125  $r/m$  value of 1.2, similar to *S. aureus*, which was recently reported to have a core-genome  $r/m$  of ~1  
126 (19). Compared to other species with wide host-ranges such as *Campylobacter jejuni* ( $r/m = 150$ ) and  
127 *Listeria monocytogenes* ( $r/m = 85$ ) (19), it appears that HGT has a less prominent role in diversification  
128 of the *S. saprophyticus* core genome. Plasmids are an alternative mechanism for introducing genetic  
129 novelty, via acquisition of accessory gene content. We used a comprehensive database of plasmid  
130 sequences (20) to identify plasmids in our de novo assemblies and found that plasmid content was  
131 variable among isolates of *S. saprophyticus*. About half the isolates in our study did not have any  
132 matches to the plasmid database, while the other half of isolates had between one and five plasmids  
133 (Figure S2). We used multi-dimensional scaling (MDS) to group plasmid sequences into eight different  
134 sequence groups and found these groups distributed throughout the phylogeny (Figure S2). Overall,  
135 this indicates that like the patterns we observed in accessory gene content, plasmid content is highly  
136 variable between strains and likely represents an important source of genetic novelty for *S.*

137 *saprophyticus* given the relatively low rates of core genome HGT. Given the diversity in plasmid content  
138 we observed here it is possible that isolates without any identifiable plasmids carry plasmids that do not  
139 share sequence similarity with those in the database. Future work using long-read sequencing will  
140 elucidate the true diversity in *S. saprophyticus* plasmid content.  
141

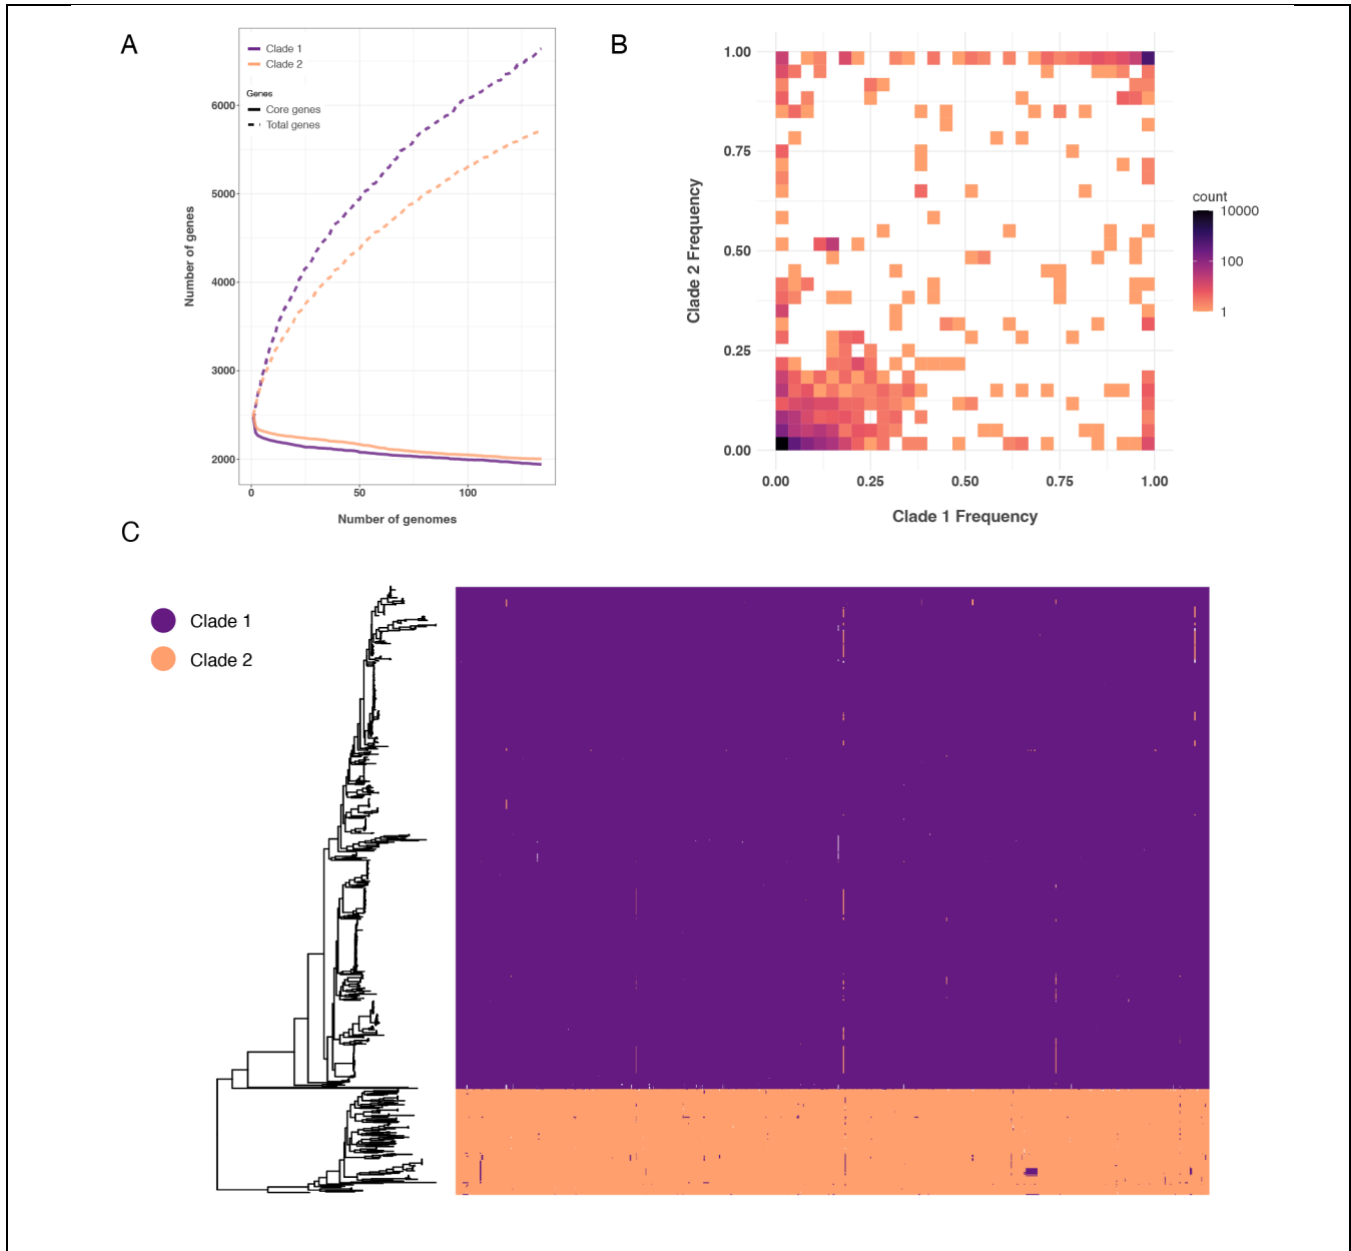

**Figure 2: *S. saprophyticus* clades are reproductively isolated.** A) Accumulation and rarefaction curves calculated using gene presence/absence matrices from separate pangenome analyses of each clade. Clade 1 has a larger accessory genome than Clade 2, while core genome sizes of the two clades are similar. B) Accessory genes present in at least one isolate of each clade are plotted to compare their frequency, showing that accessory gene content is differentially maintained by the two clades. C) Inter-clade recombination

predicted using FastGEAR. Despite evidence of moderate intra-clade recombination, inter-clade recombination is rare, indicating that the clades are reproductively isolated.

142

143 *Barriers to horizontal gene transfer between major clades of S. saprophyticus*

144 The presence of two clades within the global population of *S. saprophyticus*, designated here as Clades  
145 1 and 2, has been described in previous genomic surveys (10–12). These clades are genetically  
146 distinct at the core genome level – between-clade ANI values range from 95-99% - but not diverged  
147 enough to be considered separate sub-species by the standard definition (Figure S3A). Although  
148 strains from the two clades appear to be found from similar environments (Figure 1), similar geographic  
149 regions, and similar time periods (Figure S1), our results demonstrate that the clades occupy distinct,  
150 cryptic niches.

151

152 We performed separate pangenome analyses on each clade to identify whether the clades were  
153 uniform with respect to accessory gene content and found that 1) the clades have different pangenome  
154 structures and 2) the clades contain distinct accessory gene content. Rarefaction and accumulation  
155 curves show that, adjusting for differences in sample size, Clade 1 has a larger pangenome despite  
156 similarly sized core genomes (Figure 2A). We also examined the frequencies of accessory genes and  
157 found that they are maintained at different frequencies in the two clades, consistent with barrier(s) to  
158 gene flow between the clades (Figure 2B). When examining genes that are shared across clades,  
159 including both core and accessory genes, we found nucleotide diversity to be significantly higher for  
160 between-clade versus within-clade comparisons (Figure S3B). This provides further evidence of  
161 barriers to gene flow between clades. The two clades are distinct with respect to pan genome size,  
162 nucleotide sequence of core and accessory genes, and content of the accessory genome.

163

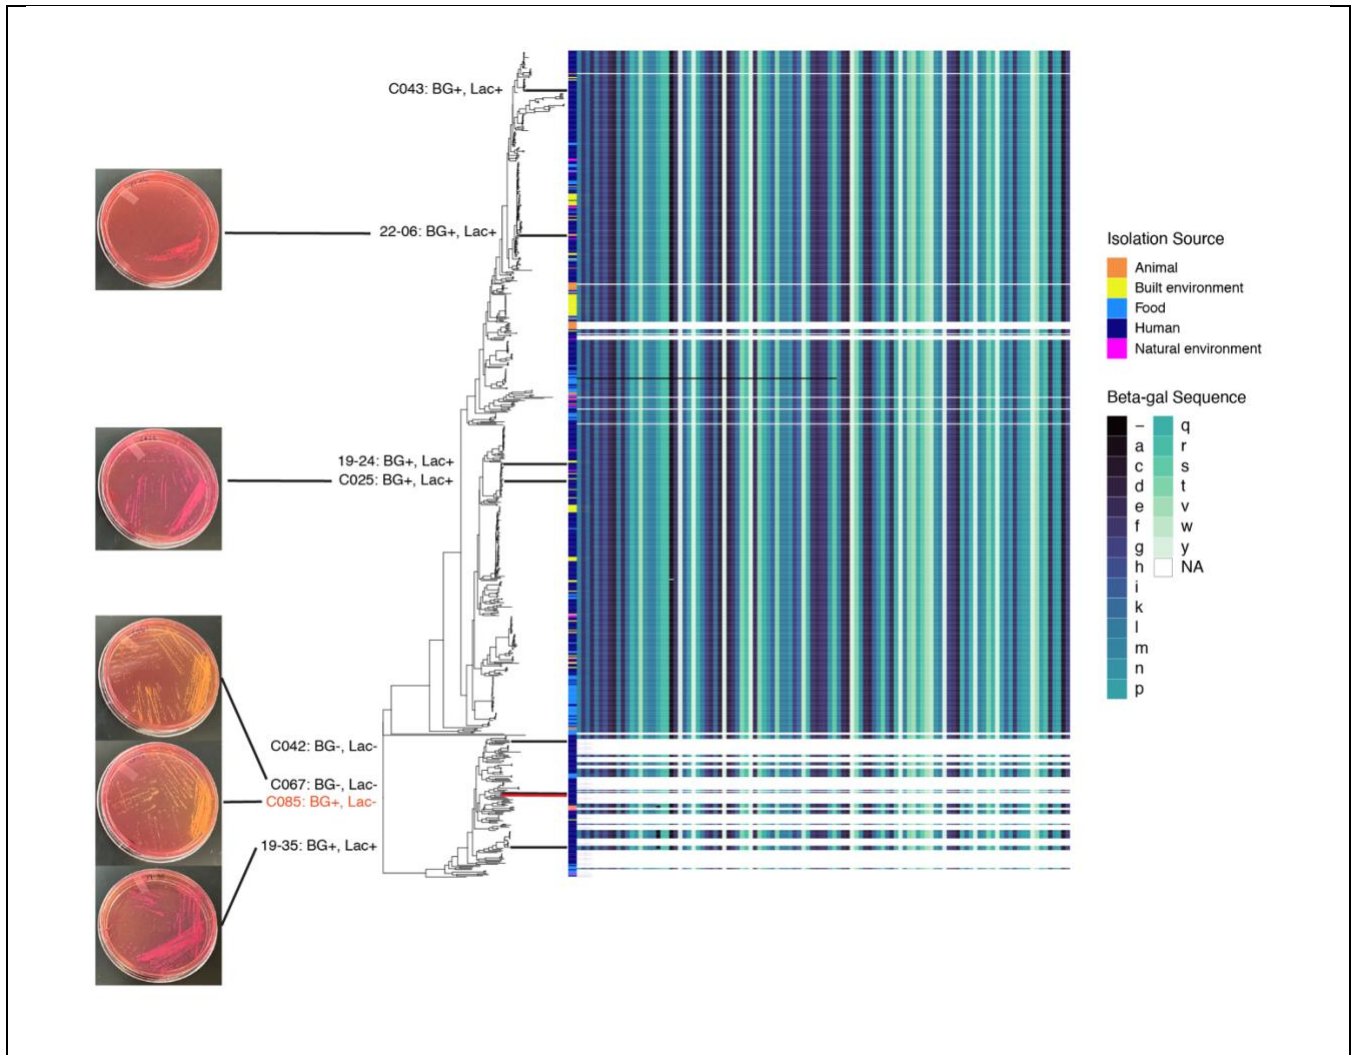

**Figure 3: Niche separation of *S. saprophyticus* clades by lactose metabolism.** Amino acid sequence of EbgA beta-galactosidase (beta-gal) is plotted next to the core genome phylogeny showing that the sequence is highly conserved at the protein level. Beta-gal is almost fixed in Clade 1 isolates (97%), while a minority of Clade 2 isolates carry the gene (30%). Lines to the right of the phylogeny indicate the strains that were tested for their ability to metabolize lactose. BG+/- indicates the presence/absence of beta-gal in that strain, and Lac+/- indicates whether that strain was positive/negative for lactose metabolism on MacConkey agar. Representative photos from each clade show results positive for lactose metabolism (Lac+, pink colonies) and those negative for lactose metabolism (Lac-, yellow colonies). Out of 8 strains we tested, only one (C085, shown in red) was an outlier in that it carries beta-gal but did not test positive for lactose metabolism.

164

165

166

167

168

169

It was previously reported that patterns of recombination differed between the clades (10), a pattern that was replicated in our study: Clade 2 has a 3x higher r/m value as well as significantly more and significantly longer recombinant fragments than Clade 1 (Figure S4). Despite having a higher recombination rate, Clade 2 has a smaller pangenome than Clade 1 (Figure 2A). Differences in pangenome structure and recombination within the same species can indicate differences in bacterial



170 niche (21, 22). We used FastGear (23) to detect HGT between the two clades, and these analyses  
171 identified very few inter-clade recombination events (Figure 2C). Taken together, these analyses  
172 suggest that the clades occupy subtly different niches and that one or more barriers to HGT prevent  
173 genetic exchange between the clades.

174

175 Restriction-modification systems (RMS) serve as innate bacterial immune systems by eliminating  
176 foreign DNA based on methylation patterns (24) and are a mechanism of preventing DNA exchange.  
177 We used a database of RM system genes (25) to annotate RMS genes in our sample and identified a  
178 set of RM genes at substantially different frequencies in each clade (Figure S5). These differences in  
179 RMS may provide a mechanistic barrier to HGT between clades, however are likely to be other factors  
180 that maintain differences in RMS between the clades. We hypothesized that differences in metabolism  
181 between isolates from different clades would allow them to co-localize yet occupy distinct ecological  
182 niches. We used the program Metabolic (26) to annotate metabolic pathways and enzymes in our  
183 assemblies, and found that the gene encoding beta-galactosidase (*ebgA*, similar to gene SSP0105 in  
184 the reference genome), an enzyme involved in lactose metabolism, is differentially maintained within  
185 clades of *S. saprophyticus* with 97% of Clade 1 isolates carrying the gene, compared to only 30% of  
186 Clade 2 isolates (Figure 3). We used growth on differential medium (MacConkey agar) to test the  
187 capacity for lactose metabolism in isolates from the two clades. All of the Clade 1 isolates in our strain  
188 collection encode *ebgA*, and all isolates that we tested from this clade were able to metabolize lactose  
189 (Figure 3). For Clade 2, we were able to test strains with and without beta-galactosidase (beta-gal<sup>+/−</sup>).  
190 As predicted, beta-gal<sup>−</sup> strains were defective for lactose metabolism. One of two beta-gal<sup>+</sup> Clade 2  
191 isolates was able to metabolize lactose. The Clade 2 strain C085 (human UTI) encodes a full-length  
192 copy of *ebgA*, without any defects in sequence or length, yet did not metabolize lactose (Figure 3). In  
193 summary, our data reveal differences in metabolism between the two major clades of *S. saprophyticus*,  
194 with Clade 2 isolates commonly lacking the capacity for lactose metabolism through the absence of  
195 *ebgA* and other mechanisms. We hypothesize that the genetic barrier we identified between clades  
196 reflects mechanistic barriers to between-clade HGT via differentiated RMS and their separation into  
197 distinct metabolic niches.

198

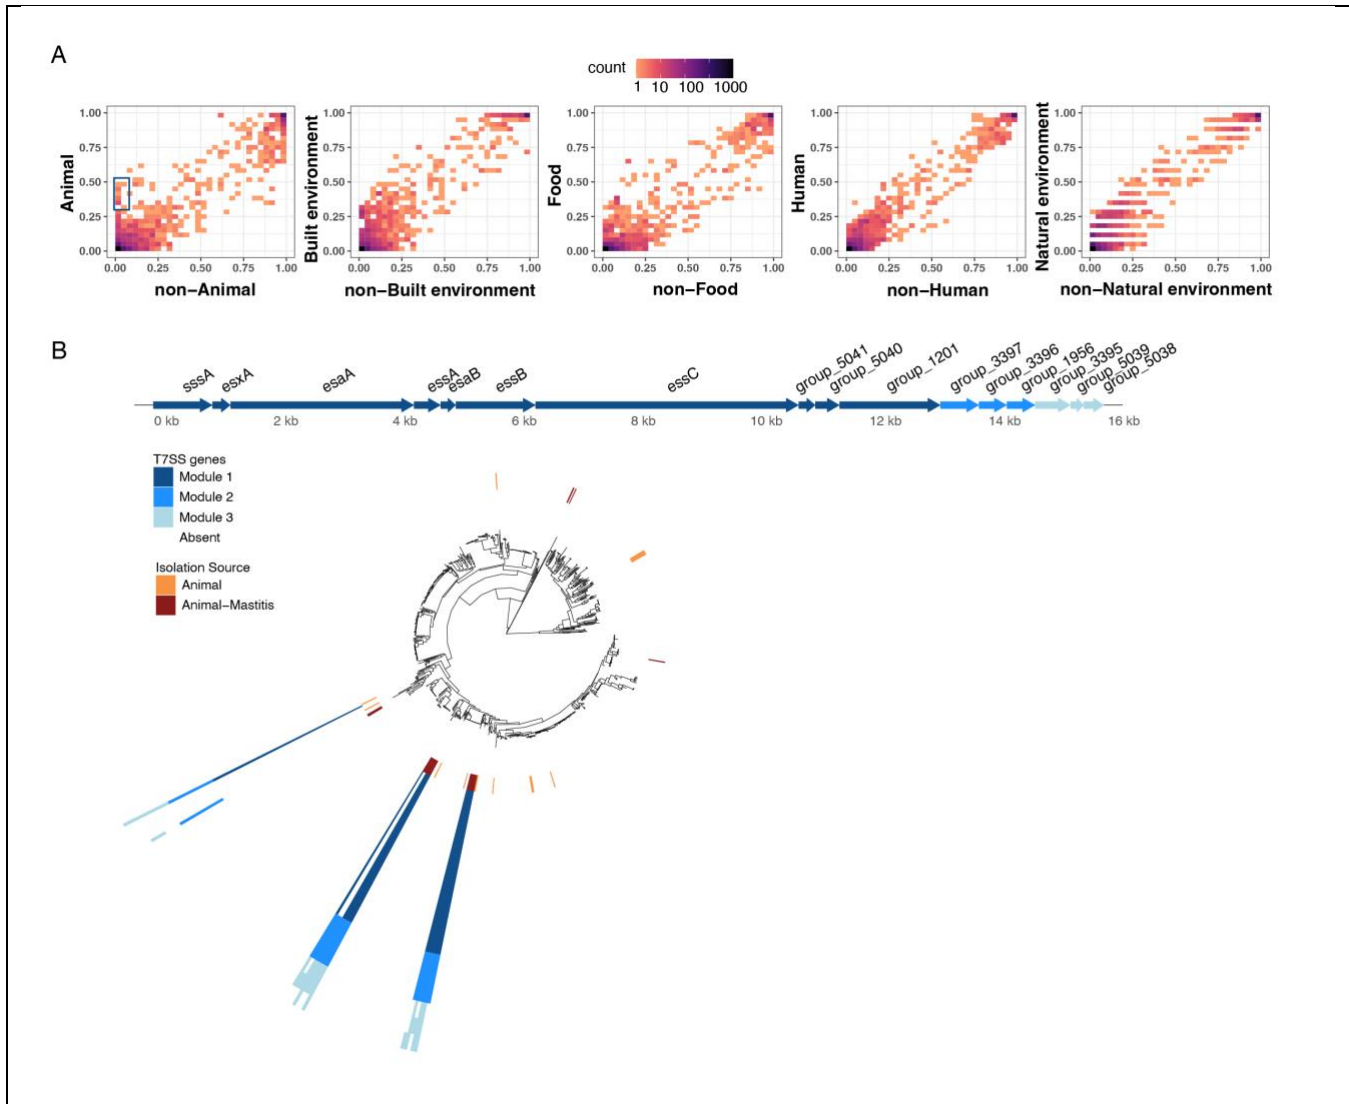

**Figure 4: Type VII secretion system found in bovine mastitis isolates.** A) Frequencies for all accessory genes in the pangenome ( $n = 11,952$ ) are plotted by isolation source on the y-axis with the average frequency in all other sources on the x-axis. Overall, accessory genes are at similar frequencies in all niches, except for a few genes that appeared uniquely associated with animal isolates (outlined in blue). B) Genes encoding a Type VII secretion system (T7SS) are very significantly associated with isolates from bovine mastitis. 78% (14/18) of bovine mastitis isolates encode a full or partial T7SS, while only 1 other isolate (19-02, human UTI) encodes the T7SS. Genes in the T7SS operon is divided into three “modules” that are generally found together within the same genome. Inner ring around the core genome phylogeny indicates isolates from cases of bovine mastitis as well as isolates from other animal sources. Outer rings indicate presence/absence of T7SS genes (in the same order as the gene operon) and are colored by module.

199

200 *Pathoadaptation of S. saprophyticus associated with bovine mastitis*

201 While the genetic differentiation of the two major clades appears to reflect an important separation of  
 202 metabolic niches, the clade structure does not explain bacterial associations with pathogenicity or other  
 203 traits as Clades 1 and 2 are both found in diverse environments, including within humans and other

204 animals (Figure 1). In order to identify genotype-phenotype associations with the varied environments  
205 where *S. saprophyticus* is found, we first examined accessory gene content. Broad-scale patterns of  
206 accessory gene presence/absence are for the most part homogenous across isolation sources (Figure  
207 4A). Overall differences in accessory gene frequency are minimal and appear random, except for a  
208 handful of genes that were uniquely associated with animal isolates. Using Scoary (27) to test the  
209 strength of association between accessory gene content and isolation source we found that these  
210 genes were highly significantly associated with animal isolates (Supplementary Data 2). Closer  
211 inspection of the genes revealed a full type VII secretion system (T7SS) operon (Figure 4B). This is the  
212 first description of a T7SS in *S. saprophyticus*, which has been described previously in other  
213 coagulase-negative staphylococci (CNS) (28, 29). In our sample of *S. saprophyticus* the T7SS is almost  
214 exclusively found in isolates from bovine mastitis: 78% (14/18) bovine mastitis isolates in our sample  
215 carry the T7SS, while only one non-mastitis strain (19-02, human UTI) carries the element (Figure 4B).  
216 The *S. saprophyticus* T7SS genes are organized in an operon structure very similar to that of *S. aureus*  
217 (30) and *S. lugdunensis* (28) that is conserved across isolates in this sample. Blast results show that  
218 the sequence of the T7SS in our sample most closely resembles T7SS genes from *S. arlettae*, a  
219 closely related CNS species that colonizes animals (31). Given its distribution across the phylogeny, we  
220 hypothesize that the T7SS has been horizontally acquired multiple times from other *Staphylococcus*  
221 spp. and that it is under positive selection in *S. saprophyticus*. Given the association with mastitis  
222 isolates, we further hypothesize that it plays a role in mastitis pathogenesis; virulence properties  
223 conferred by the T7SS could be advantageous or they may represent off target effects. In *S. aureus* the  
224 T7SS is required for virulence in many models of infection (32) and is important for resistance against  
225 host-immune pressures (33). The same may be true for *S. saprophyticus*, perhaps allowing bacteria to  
226 invade otherwise depauperate bovine tissues and escape from competition with other microbes. The  
227 T7SS provides the clearest example in our data of a significant association between accessory gene  
228 content and host or environmental niche, which may be a function of incomplete sampling and/or a  
229 multitude of adaptive pathways for *S. saprophyticus* to the same niche.

230

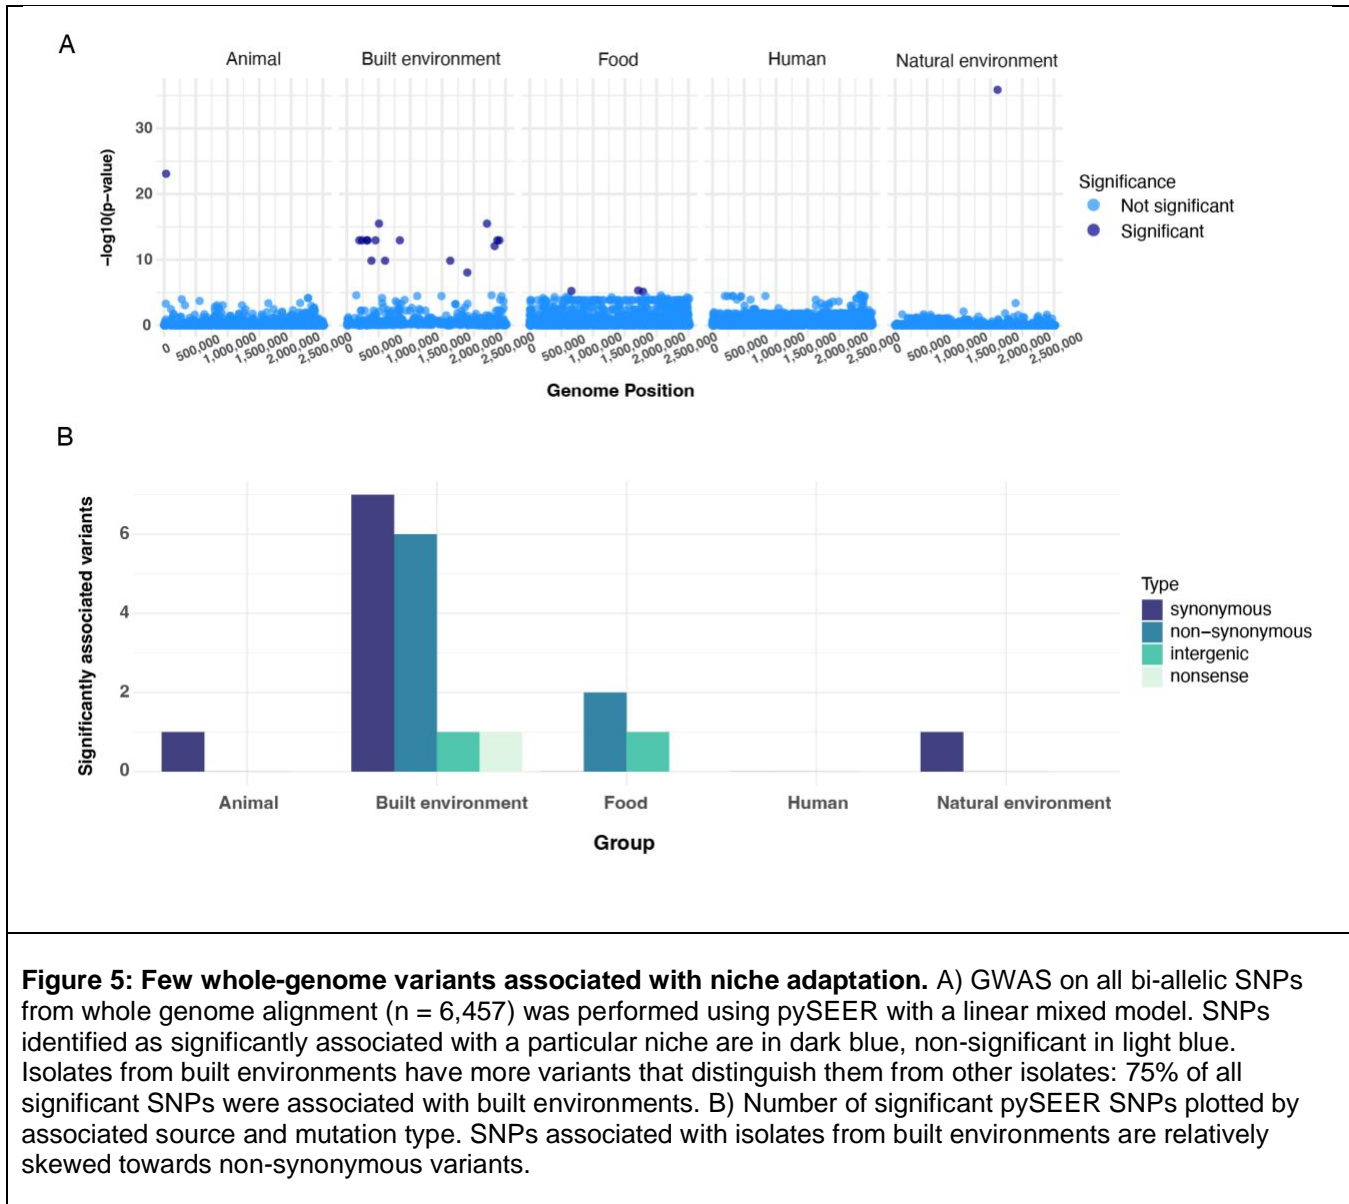

231

232 *Associations between SNPs and isolate source*

233 To further investigate associations between bacterial genetic loci and environmental niche, we  
234 performed genome-wide association studies (GWAS) of single nucleotide polymorphisms (SNPs). We  
235 used pySEER (34), a tool specifically designed for use with microbial genomes, to test whether specific  
236 genome variants were associated with adaptation to a particular niche. Two highly significant results  
237 include a synonymous SNP associated with natural environments that lies within an L-serine  
238 dehydratase, and another synonymous SNP associated with animals that lies within the 2-component  
239 system regulator Yych, which in *S. aureus* helps regulate the expression of autolysins (35). Aside from  
240 these two examples, out of ~6,500 variants we tested from the whole genome alignment, generally few

241 if any variants were significantly associated with a single isolation source (Figure 5). This pattern also  
242 held true when the same analysis was performed using only core genome SNPs (Figure S6). Built  
243 environments were, however, exceptional among isolate sources. A markedly larger number of variants  
244 associated with isolates from built environments in both whole- and core genome analyses. SNPs  
245 significantly associated with built environments make up 75% and 80% of all significant SNPs from the  
246 whole-genome and core genome analyses, respectively. Examining the types of mutations associated  
247 with isolates from built environments, we find that a large proportion of them are within coding regions,  
248 either synonymous or non-synonymous, indicating that many of these mutations could be expected to  
249 have impacts on protein function (Figure 5B). We annotated the genes containing these associated  
250 variants using clusters of orthologous group (COG) categories and found that most are either function  
251 unknown (S) or amino acid metabolism (E) (Table S2).  
252

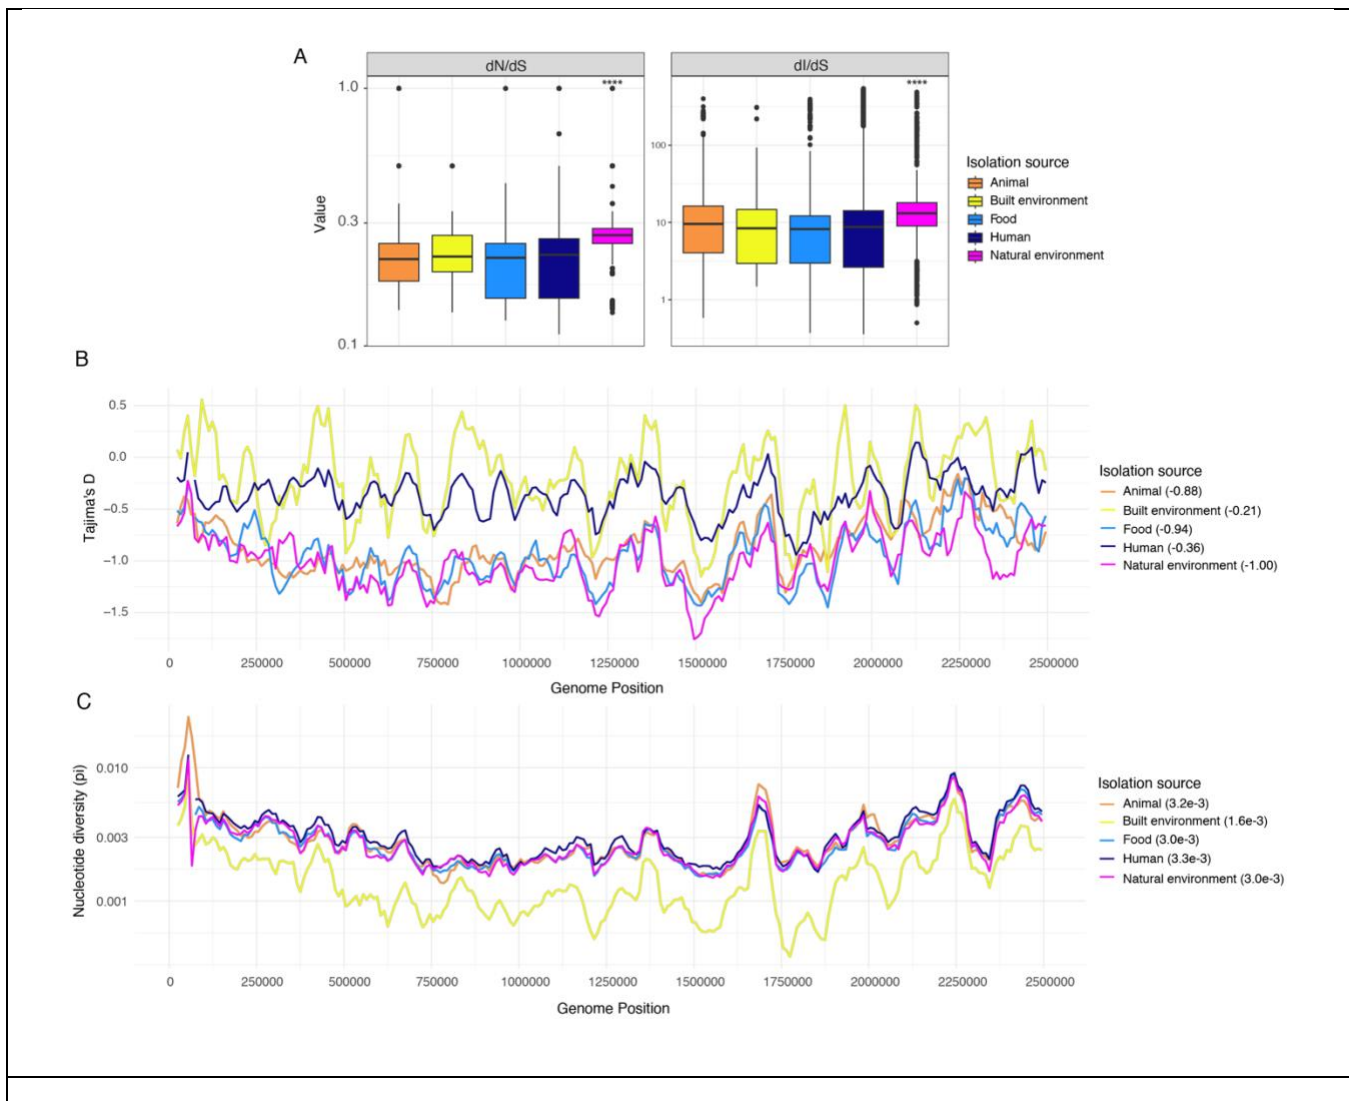

**Figure 6: Niches of *S. saprophyticus* exert different selective pressures.** A) dN/dS (left) and dl/dS (right) were calculated for all pairs of core genome alignments from a given isolation source. Isolates from natural environments have significantly (Mann-Whitney U test with Bonferroni correction, \*\*\*\*:  $P < 0.0001$ ) higher dN/dS and dl/dS than other niches. Population genetics statistics were calculated in sliding-windows (window size: 50,000 bp, step size: 10,000 bp) across whole genome alignments of isolates from different sources. Alignments were repeatedly (100x) sub-sampled to the size of the smallest sample (natural environment, n=17) and the mean Tajima's D (C) and nucleotide diversity (D) values from all sub-samples per window was plotted. Mean genome-wide statistics are listed in the legend of each plot.

253

254 *Built environments exert unique selective pressure*

255 We hypothesized that the striking number of *S. saprophyticus* SNPs associated with built environments  
256 pattern could result from unique selective pressures encountered in this niche. We first examined  
257 overall ratios of non-synonymous (dN/dS) and intergenic (dl/dS) variation to synonymous variation  
258 within sub-populations from each source and found that, apart from natural environments, different  
259 source types had similar values of genome-wide dN/dS. Natural environments had significantly higher  
260 dN/dS and dl/dS (Figure 6A). We hypothesize that this pattern could reflect the increased relative  
261 diversity of environments we have collected under "natural environments" (including soil, salt and fresh  
262 water) but future analyses of a larger sample of isolates from natural environments may reveal more.  
263 An alternative, and not mutually exclusive, explanation could lie in the complexity of natural  
264 environments such as soil, which is estimated to contain a majority of the earth's biodiversity (36).

265

266 Built environments stood out from the other sources in our sample with respect to other aspects of  
267 population genetic diversity summarized with Tajima's D (the difference between the observed and  
268 expected variation within a population) and nucleotide diversity ( $\pi$ ). The bacterial sub-population from  
269 built environments has a neutral Tajima's D ( $D = 0$ ), consistent with a neutrally evolving population with  
270 stable population size (Figure 6C) and lower nucleotide diversity, indicating a more genetically  
271 homogeneous population (Figure 6D). This contrasts with isolates from animals, food and natural  
272 environments, which have higher diversity and negative genome-wide values of Tajima's D, consistent  
273 with population expansion. In summary, we found that isolates from built environments have signatures  
274 of a stable population size, low diversity, and more significantly associated variants that distinguish  
275 them from other sources. We hypothesize that these results indicate a non-random filtering of isolates  
276 that can survive in built environments, leading to a relatively stable population size and reduced  
277 diversity.

278

## 279 Discussion

280 Analyzing a diverse sample of genomes, we have identified barriers to horizontal gene transfer (HGT)  
281 and differences in metabolic capacity between the major clades of *S. saprophyticus*. Although the  
282 division into two clades is fundamental to the genetic structure of *S. saprophyticus* populations, it does  
283 not explain niche associations for this peripatetic bacterium. *S. saprophyticus* appears to be panmictic:  
284 diverse bacteria are associated with individual environments, and conversely, diverse environments are  
285 associated with genetically similar bacteria. Within this fluid population structure, our fine-scale  
286 analyses have revealed genomic imprints of specific environments, namely pathoadaptation via the  
287 acquisition of a Type VII secretion system associated with bovine mastitis, and an overall winnowing of  
288 diversity in association with what are likely extreme environments, i.e. human-made environments.  
289 Overall, this work paints a picture of a bacterium that is both generally adapted to transition between  
290 diverse environments and also adapt to specific niches.

291

### 292 *Divergence of S. saprophyticus clades*

293 Our results show that *S. saprophyticus* isolates from Clades 1 and 2 are genetically distinct with respect  
294 to gene content (Figure 2B) and nucleotide sequence of the core and accessory genomes (Figure S3).  
295 We further find evidence suggesting they are reproductively isolated, as recombination between clades  
296 appears to be rare (Figure 2C). Differences in restriction-modification systems (RMSs) (Figure S5) and  
297 metabolic capacity (Figure 3) offer potential explanations for the observed clade structure, which is  
298 likely due to multiple mechanistic and ecological factors, including the reinforcing effect of genetic  
299 differentiation in depressing recombination (37). These results parallel observations in other species of  
300 coagulase negative *Staphylococcus*: distinct clades of *Staphylococcus epidermidis* that appear  
301 specialized to different niches on the human body show evidence of barriers to HGT in their genomes  
302 (38). However, unlike *S. epidermidis*, our data suggest that *S. saprophyticus* isolates from each clade  
303 inhabit the same environments (Figure 1), excluding the possibility of a simple spatial barrier to HGT  
304 between clades. Other examples of barriers to HGT between isolates of the same species include  
305 *Campylobacter jejuni* (39) and species within the genus *Gardnerella* (40) which are both highly  
306 recombinogenic and yet display significant restrictions on HGT in natural populations. In neither case  
307 was a mechanistic barrier to HGT identified; in fact, *C. jejuni* lineages are able to exchange genetic  
308 material in vitro, indicating that the barriers to HGT in natural populations are ecological.

309

### 310 *Diverse ecology and generalism of S. saprophyticus*

311 *S. saprophyticus* is not a permanent member of the human genitourinary or gastrointestinal tracts but  
312 seems to be a transient colonizer in a minority of the population (41). A striking feature of colonization

313 and infection with *S. saprophyticus* is the pattern of seasonality found in many parts of the world. In  
314 temperate climates, colonization, and infection by *S. saprophyticus* is most common in the warmer  
315 months of the year, spring through autumn (41–44). This distinguishes *S. saprophyticus* from other  
316 human pathogens such as uropathogenic *E. coli* and *Staphylococcus aureus*, which have a more stable  
317 residency in the microbiome punctuated by invasion and disease (45, 46). *S. saprophyticus* exhibits  
318 further singularity in that, unlike other pathogens with a variety of niches and/or multiple hosts, it does  
319 not display lineage level adaptation to specific hosts (Figure 1). This contrasts with patterns among  
320 other *Staphylococcus* spp. (17, 47) and *Campylobacter* spp. (48–50), for which specific lineages exhibit  
321 strong associations with particular hosts. We hypothesized that adaptation to different niches may  
322 occur at a finer scale in *S. saprophyticus*, but found that in general, accessory gene content and core  
323 genome variants appear homogenous across isolates from different niches (Figure 4, Figure 5). These  
324 results suggest that *S. saprophyticus* is a generalist in both habitat and host-types. Central to the idea  
325 of bacterial niche specialization is that adaptations which provide a fitness benefit in one environment  
326 will reduce fitness in another (51). This does not appear to be the case for *S. saprophyticus*, which is  
327 readily isolated from multiple hosts, natural and built environments as well as food products, with no  
328 evidence of restriction to a single niche.

329  
330 Within this fluid structure, we did identify a striking example of pathoadaptation in the acquisition of a  
331 type VII secretion system (T7SS) that is strongly associated with bovine mastitis (Figure 4). The T7SS  
332 has been identified in other CNS species (28, 29) and has a well-characterized role in the pathogenesis  
333 of *S. aureus* (32, 33), but has not been previously been identified or characterized in *S. saprophyticus*.  
334 In our analyses, the T7SS was associated with a specific pathogenic niche distinct from animals in  
335 general, from commensal isolates of cattle, and even from isolates causing other kinds of invasive  
336 disease in cattle that were also present in this sample (Supplementary Data 1). We hypothesize that  
337 mastitis infections are distinct from other invasive infections in cattle due to the formation of a contained  
338 infection within abscesses. T7SS are known to be important for abscess formation in *S. aureus* (52–  
339 54). This contrasts with uncomplicated UTIs, which are also associated with *S. saprophyticus* (1), but  
340 which are not closed-space infections. All of the bovine mastitis isolates carrying the T7SS in our  
341 sample were from cases of sub-clinical mastitis, indicating a less severe form of mastitis where there is  
342 a lack of visible indicators of infection (55). Coagulase-negative staphylococci (CNS) are major causes  
343 of both clinical and sub-clinical mastitis (56–59), although this varies by region and it appears that in  
344 some regions CNS are less prevalent in clinical mastitis samples (60). Future work may reveal the role  
345 of the T7SS in *S. saprophyticus* bovine mastitis and further clarify the association between the T7SS  
346 and sub-clinical mastitis.



347

348 *Source-sink dynamics in the ecology of S. saprophyticus*

349 We show here that broad-scale patterns of genetic diversity in *S. saprophyticus* are relatively  
350 homogenous across distinct environments. Within this large pan-genome the high diversity of  
351 accessory gene content held at rare frequencies raises the possibility that adaptation to any one niche  
352 can proceed by a multitude of pathways, which would render identification of genotype-phenotype  
353 associations challenging (61). This, we hypothesize, is the reason that niche does not appear to have a  
354 prominent role in structuring accessory gene content (Figure 4). In our analysis of genome variants, we  
355 found that only isolates from built environments had more than a few significantly associated SNPs  
356 (Figure 5, Figure S6). In comparison with other niches, bacteria from built environments also have  
357 lower relative diversity and a more balanced site frequency spectrum suggesting stable as opposed to  
358 expanding population size (Figure 6). Synthesizing these observations we infer that *S. saprophyticus*  
359 entering built environments undergo a non-random filtering process. We hypothesize that this process  
360 filters for variants that increase bacterial tolerance for dry environments and desiccation, which would  
361 be a fitness advantage in the built environments sampled here (generally fomites or air; Supplementary  
362 Data 1). A helpful framework for thinking about bacterial adaptation to new habitats is the source-sink  
363 model (62), where the “source” population consists of the permanent niche or reservoir of a bacterial  
364 species, and the “sink” population exists in a different niche or environment and is fed by the source  
365 population. Here we are using the definition of source-sink specifically adapted to bacterial pathogens  
366 (62), where the establishment of a sink population is not necessarily a neutral process as is often  
367 described in classical population ecology (63). A relevant example of these dynamics is repeated  
368 adaptation within the FimH adhesin of uropathogenic *E. coli*, which has been hypothesized to underlie  
369 the repeated emergence of *E. coli* lineages into the urinary tract (64). We propose that built  
370 environments represent a sink, which is fed by one or more source populations of *S. saprophyticus*.  
371 Staphylococci are some of the most abundant members of the built microbiome, and transmission from  
372 fomites of *S. aureus* is a known pathway for strains causing human infections (65). Conversely, studies  
373 show that the majority of the built environment microbiome is made up of human-associated microbes  
374 (65), indicating that transmission of *S. saprophyticus* to built environments is most likely from human  
375 sources. A clear example of this phenomenon is the *S. saprophyticus* sample from the International  
376 Space Station (Supplementary Data 1) where transmission from the natural environment, animals and  
377 or animal food products would be virtually impossible. Other built environments such as kitchens may  
378 be colonized by *S. saprophyticus* after contact with animal food products. A more thorough sampling of  
379 different built environments may identify the sources of *S. saprophyticus* and provide insight into the  
380 frequency of transmission from the built environment back into humans.

381

### 382 *Adaptation of Aas*

383 In a previous study we identified a non-synonymous SNP in the bifunctional adhesin-autolysin gene *aas*  
384 that had putatively undergone a selective sweep (12). The derived allele of the SNP was also  
385 significantly associated with isolates from human UTIs. In the current study, the association between  
386 the *aas* allele and UTI isolates is no longer significant. However, the evidence for a selective sweep at  
387 this locus is retained in these data; using a sample 13x larger than was used for our first analysis, we  
388 have recapitulated the dip in Tajima's D surrounding this locus that indicates a selective sweep (Figure  
389 S7). The evidence points to a sweep in Clade 1 only, with the dip in Tajima's D being present only in  
390 the alignment of Clade 1 isolates (Figure S7). Mapping the alleles of the *aas* locus onto the core  
391 genome phylogeny of our sample shows that the alleles are highly structured on the phylogeny: 82% of  
392 Clade 1 isolates have the derived allele while only 28% of Clade 2 isolates have it (Figure S7). While  
393 this SNP in *aas* is not associated with a particular isolation source, it appears to be under directional  
394 selection, indicating that it may play a role in the evolution of *S. saprophyticus* populations beyond any  
395 role it plays in invasion of the human urinary tract. Adaptation of Aas could be a contributing factor in  
396 what appears to be recent population expansion in Clade 1, which has overall lower Tajima's D values  
397 and shorter branch lengths relative to Clade 2 (Figure S7). It is yet unclear how this fits in with the  
398 differences in lactose metabolism we identified between the clades but it's possible that changes to  
399 metabolic capacity and adhesin properties allow the bacterium to migrate between environments more  
400 easily, allowing for relative population expansion. Future work looking at the evolution of Aas, possibly  
401 using a source-sink framework as was described above for the FimH adhesin in *E. coli*, could reveal  
402 more about the contribution of Aas to the evolution of *S. saprophyticus* populations.

403

### 404 *The problem of transmission*

405 Our results indicate that *S. saprophyticus* isolates are able to move freely between environments. What  
406 remains unclear is exactly how *S. saprophyticus* is transmitted, and which transmission pathways lead  
407 to human and animal infections. Prior epidemiological studies have shown that swimming and  
408 occupations related to food production increase the risk of *S. saprophyticus* UTI (66). Genitourinary  
409 colonization by *S. saprophyticus* is transient (41), providing further evidence that at least some  
410 infections are environmentally acquired (rather than transmitted person-to-person). An inexplicable lack  
411 of temporal signal (Figure S1B) in the phylogeny of *S. saprophyticus* makes it difficult to ascertain the  
412 directionality of transmission between different hosts and environments using traditional phylogenetic  
413 approaches (10–12). Directions for new research may be taken from the study of other generalist  
414 bacterial pathogens with multiple environmental reservoirs. For example, species of the genus

415 *Campylobacter* similarly occupy a wide variety of environments and are a leading cause of food-borne  
416 illness (67). Studies combining epidemiological and sequencing data have proven very useful in  
417 identifying the animal and environmental sources of *Campylobacter* infection (68–70). Additionally,  
418 computational models of transmission dynamics in *Campylobacter* have highlighted the role of insect  
419 vectors in transmission (71, 72). For *S. saprophyticus* there is still much to learn about transmission  
420 dynamics, including the role of food products and built environments in transmitting *S. saprophyticus*.  
421 We know that occupations in food production are a risk factor for *S. saprophyticus* UTI (66), but this  
422 group represents a very small proportion of the population. This opens the question of what, if any role,  
423 routine contact with and consumption of animal food products plays in *S. saprophyticus* UTI as was  
424 recently shown for *E. coli* (73). Additionally, our results show that built environments, including some  
425 isolates from wastewater, appear to act as a ‘sink’ where diversity of *S. saprophyticus* is lost. The  
426 duration of colonization of these environments is still in question, whether the colonization is transient  
427 and if these strains are transmitted back into the source populations may be ascertained using a more  
428 thorough sampling approach.

429

#### 430 *Limitations and future directions*

431 The results presented here are limited by the biased sampling of *S. saprophyticus* thus far. Isolates  
432 from human infections have been heavily sampled while isolates from other important reservoirs of *S.*  
433 *saprophyticus* like animals and the natural environment have been under sampled. In this work we  
434 have compensated for differences in sample size wherever possible however future sampling efforts  
435 directed at underrepresented sources will increase power for detecting niche-specific adaptations and  
436 further clarify the source-sink dynamics at play in *S. saprophyticus* ecology. Combining whole-genome  
437 sequencing (WGS) efforts with epidemiological surveys will help elucidate the transmission network of  
438 *S. saprophyticus* and inform strategies for the control of human and animal infection by this pathogen.

439

440 **Methods**

441

442 *Isolation & growth of S. saprophyticus*

443 All incubation steps in the isolation protocol are at 37°C with 5% CO<sub>2</sub> supplementation for 24 hours  
444 unless otherwise stated. Wastewater samples taken from the aeration basin were inoculated into  
445 Tryptone NN broth (Tryptone [Gibco] with 2 ug/mL novobiocin and 300 ug/mL nalidixic acid) and grown  
446 before being struck onto Mannitol Salt Agar (MSA; Neogen cat. NCM0078A) plates. Colonies positive  
447 for mannitol fermentation (yellow halo on MSA plates) were gram stained to include only Gram-positive  
448 cocci which were then seeded into 3mL LB (Thermo Scientific; cat. 12780052) cultures. Liquid cultures  
449 were streaked onto CHROMagar™ Orientation plates (DRG International, cat. RT412) and small, pink,  
450 opaque colonies were selected for MALDI-TOF identification performed at the Wisconsin Veterinary  
451 Diagnostics Laboratory. Two *S. saprophyticus* isolates from wastewater were identified. Lactose  
452 metabolism was assessed by growth on MacConkey agar (Thermo Scientific; cat. CM0007B).

453

454 *DNA extraction and sequencing*

455 Isolates from wastewater and isolates provided from collaborators (8 animal/food, 6 environment, 1  
456 human skin, 137 UTI) were grown in tryptic soy broth (TSB; Thermo Scientific; cat. CM0129B) for 24 –  
457 48 hours at 37°C to an OD600 of ~1. Genomic DNA was extracted using the Qiagen DNeasy kit (cat.  
458 12224-50) and sent to either the University of Wisconsin Madison Biotechnology Center or SeqCoast  
459 for library preparation and paired end 150bp sequencing. Raw sequencing data has been deposited to  
460 the NCBI SRA under the project accession PRJNA928770.

461

462 *De novo genome assembly and annotation*

463 Raw sequencing data were quality-checked and trimmed using FastQC v0.11.8 (74) and Trimmomatic  
464 v0.39 (75), respectively. Potential contamination was identified using Kraken2 (76) and samples with  
465 significant (>20%) contamination were discarded. Samples with minimal contamination (10-20%) were  
466 filtered using KrakenTools (77) script “extract\_kraken\_reads.py” to include only reads originating from  
467 *S. saprophyticus*. Contigs were assembled using SPAdes v3.13.1 (78). Assemblies were checked for  
468 quality using Quast v5.0.2 (79) filtering out contigs shorter than 500 bp or with coverage lower than 5x,  
469 as well as confirming all assemblies had an  $N_{50}$  > 50,000 bp. Assemblies were annotated using Prokka  
470 v1.14.0 (80). Metabolic pathways and enzymes were annotated in our de novo assemblies using  
471 Metabolic v4.0 (26). Default parameters were used for all programs unless otherwise noted.

472

473 *Genome collection*

474 All *S. saprophyticus* WGS entries into the NCBI SRA database (accessed December 12, 2022) with  
475 sufficient metadata to determine isolation source were downloaded and assembled as described  
476 above. Additionally, any entries into the NCBI Assembly database for which raw data were not available  
477 were downloaded. After quality filtering we had total sample of 780 genomes, from the following  
478 sources: 538 genomes assembled from SRA data, 154 newly sequenced isolates, 87 assemblies from  
479 NCBI and 1 ancient DNA assembly (11). Genomes were grouped into one of five isolation sources:  
480 animal (mostly farm animals), built environment (human built and occupied spaces), food (food  
481 products and food production environments), human (infection and natural colonization) and natural  
482 environments (mostly soil and water). This resulted in the following sample: 32 animal, 67 built  
483 environment, 105 food, 559 human and 17 natural environment isolates.

484

#### 485 *Reference-guided genome assembly*

486 In addition to de novo assembly, we wanted to look at variation within intergenic regions, so we  
487 assembled whole genomes against a reference sequence using an in-house pipeline  
488 ([github.com/myoungblom/RGAPepPipe\\_MAY](https://github.com/myoungblom/RGAPepPipe_MAY)). Briefly, raw data was quality checked and trimmed as  
489 described above in “De novo assembly and annotation”. Reads were mapped to the *S. saprophyticus*  
490 ATCC 15305 reference genome (GCA\_000010125.1) using BWA-MEM v0.7.17 (81). Samtools v1.17  
491 view and sort (82) were used to process SAM and BAM files. Picard v2.26.4  
492 ([github.com/broadinstitute/picard](https://github.com/broadinstitute/picard)) was used to remove duplicates and add read information and Pilon  
493 v1.24 (83) was used for variant calling. Finally, assembly quality was assessed using Qualimap v2.2.1  
494 BamQC (84). For assemblies downloaded from NCBI that did not have raw data, Mummer v4.0.0 (85)  
495 was used to align the assemblies to the reference genome using a custom script  
496 ([github.com/myoungblom/sapro\\_genomics](https://github.com/myoungblom/sapro_genomics)). Repetitive regions were identified in the reference genome  
497 using Mummer v4.0.0 (85) and these regions were masked in the resulting reference guided alignment.

498

#### 499 *Pangenome analyses*

500 Separate pangenome analyses were performed using Roary v3.12.0 (86) on the following groups: total  
501 sample (n=780), Clade 1 (n=646) and Clade 2 (n=134). For all pangenome analyses the minimum  
502 blastp threshold for ortholog clustering was set to 85% (-i 85), paralogs were not split (-s) and a core  
503 genome alignment was made using Prank (-e). Rarefaction and accumulation curves were created  
504 using modified versions of published scripts (87). Briefly, a gene presence-absence matrix was  
505 subsampled 100 times without replacement to the desired total number of genomes and the median  
506 value for the number of core and pan genes was plotted for each additional genome added to the

507 sample. Scripts for rarefaction and accumulation plots are available here:  
508 [github.com/myoungblom/sapro\\_genomics](https://github.com/myoungblom/sapro_genomics).

509

#### 510 *Phylogenetic trees*

511 The core genome phylogeny was inferred using the core genome alignment output by Roary (see  
512 “Pangenome analyses”) using RAxML v8.2.3 (88) using the general time reversible (GTR) model of  
513 nucleotide substitution and the CAT approximation of rate heterogeneity with non-parametric  
514 bootstrapping using the ‘autoMR’ convergence criteria. Recombinant regions were removed from the  
515 phylogeny using ClonalFrameML (18) as described below.

516

#### 517 *Horizontal gene transfer*

518 Recombinant fragments were inferred in the core genome using ClonalFrameML (18). The core  
519 genome alignment was converted into an extended multi-fasta (XMFA) file using a custom script  
520 ([github.com/myoungblom/sapro\\_genomics](https://github.com/myoungblom/sapro_genomics)) and run with the core genome phylogeny inferred using  
521 RAxML (see above) as the input tree, using 100 simulations (-emsim 100). The output was used to  
522 calculate r/m values (<https://github.com/xavierdidelot/ClonalFrameML/issues/92>), plot recombinant  
523 fragments and the recombination adjusted phylogeny was used for all figures. Recombination analyses  
524 were performed identically for the full sample and for the two clades separately. Inter-clade  
525 recombination events within the core genome alignment were predicted using FastGear (23) with  
526 default parameters. Recombinant fragments predicted by ClonalFrameML and FastGear were plotted in  
527 R using custom scripts ([github.com/myoungblom/sapro\\_genomics](https://github.com/myoungblom/sapro_genomics)).

528

#### 529 *RMS search*

530 All RMS gene nucleotide sequences were downloaded from REBASE (25) (accessed March 17, 2023)  
531 and searched against our de novo assemblies using blastn with filters to include only matches with  
532 >80% sequence identity and >80% of RMS gene length. For overlapping alignments, the result with the  
533 highest bitscore was chosen.

534

#### 535 *Plasmid identification*

536 A database of plasmid sequences from PLSDB (20) (accessed February 2, 2023) was downloaded and  
537 searched against our de novo assemblies using blastn with filters to include only matches with >80%  
538 sequence identity and >80% plasmid length. All overlapping alignments were kept for downstream  
539 analysis. Putative plasmid sequences were pulled from the de novo assemblies and pairwise mash  
540 distances were calculated with Mash v2.2 (89). To visualize the sequence relatedness of plasmids in

541 our sample we performed a multi-dimensional scaling (MDS) analysis of mash distances in R using  
542 'cmdscale'. Plasmid sequences were grouped into eight sequence types based on a plot of the MDS  
543 results.

544

#### 545 *Diversity & selection statistics*

546 ANI was calculated between all possible alignment pairs using fastANI (90) with a masked whole-  
547 genome alignment (see "Reference-guided genome assembly"). Pairwise core genome and accessory  
548 gene nucleotide diversity ( $\pi$ ) was calculated using EggLib v3.0.0 (91) with custom scripts. dN/dS was  
549 calculated across core gene alignments using the yn00 implementation (92) in PAML (93). dI/dS was  
550 calculated as previously described (94). Briefly, an alignment of core intergenic regions was made  
551 using Piggy (95) with all the same flags as were used in the pangenome calculation with Roary (see  
552 "Pangenome analyses"). dI was calculated by dividing the number of SNPs in the intergenic alignment  
553 by the length of the alignment. The dS values calculated from the core genome alignment were used to  
554 calculate both dN/dS and dI/dS. Population genetics statistics (Tajima's D and nucleotide diversity)  
555 were calculated using EggLib v3.0.0 (91). Scripts for PAML analysis, sliding window and diversity  
556 statistics available here: [github.com/myoungblom/sapro\\_genomics](https://github.com/myoungblom/sapro_genomics).

557

#### 558 *Whole genome variant GWAS*

559 pySEER v1.3.11 (34) was used to identify variants in the *S. saprophyticus* whole-genome and core  
560 genome alignments that are associated with isolation source/niche. Briefly, population structure was  
561 accounted for using phylogenetic distances extracted from the core genome phylogeny using the  
562 "phylogeny\_distance.py" script included with pySEER. Then for each phenotype (isolation source),  
563 pySEER was run using a linear mixed model (LMM) using the phylogenetic distances described above,  
564 a phenotype file with the isolation sources of all isolates and a VCF file of SNPs from the whole  
565 genome alignment made using SNP-sites v2.4.1 (96). The mixed model was chosen out of all models  
566 implemented in pySEER because it is a top performing model among microbial GWAS tools (97) and is  
567 computationally efficient for large samples. The "--output-patterns" flag was used to get the number of  
568 unique variant patterns, which when used with the "count\_patterns.py" script included with pySEER,  
569 outputs a significance threshold using a Bonferroni correction. This significance threshold was used to  
570 determine the significance of all pySEER output in addition to removing all results with a "bad-chisq"  
571 note, which indicates a failed chi-squared test. Mutation consequences (synonymous, non-  
572 synonymous, etc) of the significant pySEER results were annotated using SnpEff (98) with a custom  
573 database produced using the *S. saprophyticus* reference genome and annotation files

574 (GCA\_000010125.1). Scripts for pySEER analyses are available at  
575 [github.com/myoungblom/sapro\\_genomics](https://github.com/myoungblom/sapro_genomics).

576

### 577 **Acknowledgements**

578 We would like to thank the following people for providing samples and/or isolates for this project:  
579 Kathleen Glass & Kristin Schill (Food Research Institute), Nicole Aulik (Wisconsin Veterinary Diagnostic  
580 Laboratory), Kalan Lab (Dept. of Medical Microbiology and Immunology), McMahon Lab (Dept. of  
581 Bacteriology), Derrick Chen (UW Hospital – Clinical Microbiology), Jon Bethke (Duke University), and  
582 Marilyn Roberts (University of Washington). We would also like to thank members of the Pepperell Lab  
583 for their work gathering isolates and performing DNA extractions: Lindsey Bohr, Seanna Curran, Aidan  
584 MacKnight, Holly Murray, and Tracy Smith. We also thank the University of Wisconsin-Madison  
585 Biotechnology Center and SeqCoast for sequencing services.

586

### 587 **Conflicts of interest**

588 The authors declare no conflicts of interest.

589

### 590 **Funding**

591 MAY was funded by National Science Foundation Graduate Research Fellowship Program under grant  
592 No. DGE-1747503. This research was also supported by the National Institutes of Health NIAID  
593 R01AI113287 to CSP.

594

595



596 **References**

- 597 1. R. Raz, R. Colodner, C. M. Kunin, Who Are You—Staphylococcus saprophyticus? *Clin Infect Dis.* **40**, 896–  
598 898 (2005).
- 599 2. A. Mukherjee, B. Chettri, J. S. Langpoklakpam, A. K. Singh, D. Chattopadhyay, Draft Genome Sequence of  
600 Hydrocarbon-Degrading Staphylococcus saprophyticus Strain CNV2, Isolated from Crude Oil-Contaminated  
601 Soil from the Noonmati Oil Refinery, Guwahati, Assam, India. *Genome Announc.* **4** (2016),  
602 doi:10.1128/genomeA.00370-16.
- 603 3. O. O. Soge, J. S. Meschke, D. B. No, M. C. Roberts, Characterization of methicillin-resistant  
604 Staphylococcus aureus and methicillin-resistant coagulase-negative Staphylococcus spp. isolated from US  
605 West Coast public marine beaches. *J Antimicrob Chemother.* **64**, 1148–1155 (2009).
- 606 4. P. Hedman, O. Ringertz, M. Lindström, K. Olsson, The origin of Staphylococcus saprophyticus from cattle  
607 and pigs. *Scand. J. Infect. Dis.* **25**, 57–60 (1993).
- 608 5. P. Hedman, O. Ringertz, B. Eriksson, P. Kvarnfor, M. Andersson, L. Bengtsson, K. Olsson, Staphylococcus  
609 saprophyticus found to be a common contaminant of food. *Journal of Infection.* **21**, 11–19 (1990).
- 610 6. M. E. Srednik, M. Archambault, M. Jacques, E. R. Gentilini, Detection of a mecC-positive Staphylococcus  
611 saprophyticus from bovine mastitis in Argentina. *Journal of Global Antimicrobial Resistance.* **10**, 261–263  
612 (2017).
- 613 7. F. Bertelloni, F. Fratini, V. V. Ebani, A. Galiero, B. Turchi, D. Cerri, Detection of genes encoding for  
614 enterotoxins, TSST-1, and biofilm production in coagulase-negative staphylococci from bovine bulk tank  
615 milk. *Dairy Sci. & Technol.* **95**, 341–352 (2015).
- 616 8. M. Coton, A. Romano, G. Spano, K. Ziegler, C. Vetrana, C. Desmarais, A. Lonvaud-Funel, P. Lucas, E.  
617 Coton, Occurrence of biogenic amine-forming lactic acid bacteria in wine and cider. *Food Microbiology.* **27**,  
618 1078–1085 (2010).
- 619 9. A. De Visscher, S. Piepers, F. Haesebrouck, K. Supré, S. De Vlieghe, Coagulase-negative Staphylococcus  
620 species in bulk milk: Prevalence, distribution, and associated subgroup- and species-specific risk factors.  
621 *Journal of Dairy Science.* **100**, 629–642 (2017).
- 622 10. O. U. Lawal, M. J. Fraqueza, O. Bouchami, P. Worning, M. D. Bartels, M. L. Gonçalves, P. Paixão, E.  
623 Gonçalves, C. Toscano, J. Empel, M. Urbaś, M. A. Domínguez, H. Westh, H. de Lencastre, M. Miragaia,  
624 Foodborne Origin and Local and Global Spread of Staphylococcus saprophyticus Causing Human Urinary  
625 Tract Infections. *Emerg Infect Dis.* **27**, 880–893 (2021).
- 626 11. A. M. Devault, T. D. Mortimer, A. Kitchen, H. Kiesewetter, J. M. Enk, G. B. Golding, J. Southon, M. Kuch, A.  
627 T. Duggan, W. Aylward, S. N. Gardner, J. E. Allen, A. M. King, G. Wright, M. Kuroda, K. Kato, D. E. Briggs,  
628 G. Fornaciari, E. C. Holmes, H. N. Poinar, C. S. Pepperell, A molecular portrait of maternal sepsis from  
629 Byzantine Troy. *eLife* (2017), , doi:10.7554/eLife.20983.
- 630 12. T. D. Mortimer, D. S. Annis, M. B. O'Neill, L. L. Bohr, T. M. Smith, H. N. Poinar, D. F. Mosher, C. S.  
631 Pepperell, Adaptation in a Fibronectin Binding Autolysin of Staphylococcus saprophyticus. *mSphere.* **2**  
632 (2017), doi:10.1128/mSphere.00511-17.
- 633 13. V. S. de Sousa, R. F. Rabello, R. C. da S. Dias, I. S. Martins, L. B. G. da S. dos Santos, E. M. Alves, L. W.  
634 Riley, B. M. Moreira, Time-based distribution of Staphylococcus saprophyticus pulsed field gel-  
635 electrophoresis clusters in community-acquired urinary tract infections. *Mem. Inst. Oswaldo Cruz.* **108**, 73–  
636 76 (2013).

- 637 14. M. Widerström, J. Wiström, S. Ferry, C. Karlsson, T. Mønsen, Molecular epidemiology of *Staphylococcus*  
638 *saprophyticus* isolated from women with uncomplicated community-acquired urinary tract infection. *J. Clin.*  
639 *Microbiol.* **45**, 1561–1564 (2007).
- 640 15. W. de Paiva-Santos, V. S. de Sousa, M. Giambiagi-deMarval, Occurrence of virulence-associated genes  
641 among *Staphylococcus saprophyticus* isolated from different sources. *Microb. Pathog.* **119**, 9–11 (2018).
- 642 16. B. Kleine, S. Gatermann, T. Sakinc, Genotypic and phenotypic variation among *Staphylococcus*  
643 *saprophyticus* from human and animal isolates. *BMC Research Notes.* **3**, 163 (2010).
- 644 17. M. Matuszewska, G. G. R. Murray, E. M. Harrison, M. A. Holmes, L. A. Weinert, The Evolutionary Genomics  
645 of Host Specificity in *Staphylococcus aureus*. *Trends in Microbiology.* **28**, 465–477 (2020).
- 646 18. X. Didelot, D. J. Wilson, ClonalFrameML: efficient inference of recombination in whole bacterial genomes.  
647 *PLoS Comput. Biol.* **11**, e1004041 (2015).
- 648 19. P. González-Torres, F. Rodríguez-Mateos, J. Antón, T. Gabaldón, Impact of Homologous Recombination on  
649 the Evolution of Prokaryotic Core Genomes. *mBio.* **10**, e02494-18 (2019).
- 650 20. G. P. Schmartz, A. Hartung, P. Hirsch, F. Kern, T. Fehlmann, R. Müller, A. Keller, PLSDB: advancing a  
651 comprehensive database of bacterial plasmids. *Nucleic Acids Research.* **50**, D273–D278 (2022).
- 652 21. L. L. Bohr, M. A. Youngblom, V. Eldholm, C. S. Pepperell, Genome reorganization during emergence of  
653 host-associated *Mycobacterium abscessus*. *Microbial Genomics.* **7** (2021), doi:10.1099/mgen.0.000706.
- 654 22. M. A. Youngblom, A. C. Shockey, M. M. Callaghan, J. P. Dillard, C. S. Pepperell, The Gonococcal Genetic  
655 Island defines distinct sub-populations of *Neisseria gonorrhoeae*. *Microbial Genomics.* **9**, 000985 (2023).
- 656 23. R. Mostowy, N. J. Croucher, C. P. Andam, J. Corander, W. P. Hanage, P. Marttinen, Efficient Inference of  
657 Recent and Ancestral Recombination within Bacterial Populations. *Molecular Biology and Evolution.* **34**,  
658 1167–1182 (2017).
- 659 24. P. H. Oliveira, M. Touchon, E. P. C. Rocha, The interplay of restriction-modification systems with mobile  
660 genetic elements and their prokaryotic hosts. *Nucleic Acids Res.* **42**, 10618–10631 (2014).
- 661 25. R. J. Roberts, T. Vincze, J. Posfai, D. Macelis, REBASE: a database for DNA restriction and modification:  
662 enzymes, genes and genomes. *Nucleic Acids Res.* **51**, D629–D630 (2023).
- 663 26. Z. Zhou, P. Q. Tran, A. M. Breister, Y. Liu, K. Kieft, E. S. Cowley, U. Karaoz, K. Anantharaman,  
664 METABOLIC: high-throughput profiling of microbial genomes for functional traits, metabolism,  
665 biogeochemistry, and community-scale functional networks. *Microbiome.* **10**, 33 (2022).
- 666 27. O. Brynildsrud, J. Bohlin, L. Scheffer, V. Eldholm, Rapid scoring of genes in microbial pan-genome-wide  
667 association studies with Scoary. *Genome Biology.* **17**, 238 (2016).
- 668 28. J. Lebeurre, S. Dahyot, S. Diene, A. Paulay, M. Aubourg, X. Argemi, J.-C. Giard, I. Tournier, P. François, M.  
669 Pestel-Caron, Comparative Genome Analysis of *Staphylococcus lugdunensis* Shows Clonal Complex-  
670 Dependent Diversity of the Putative Virulence Factor, *ess/Type VII Locus*. *Frontiers in Microbiology.* **10**  
671 (2019) (available at <https://www.frontiersin.org/articles/10.3389/fmicb.2019.02479>).
- 672 29. Z. Sun, D. Zhou, X. Zhang, Q. Li, H. Lin, W. Lu, H. Liu, J. Lu, X. Lin, K. Li, T. Xu, Q. Bao, H. Zhang,  
673 Determining the Genetic Characteristics of Resistance and Virulence of the “Epidermidis Cluster Group”  
674 Through Pan-Genome Analysis. *Frontiers in Cellular and Infection Microbiology.* **10** (2020) (available at  
675 <https://www.frontiersin.org/articles/10.3389/fcimb.2020.00274>).

- 676 30. B. Warne, C. P. Harkins, S. R. Harris, A. Vatsiou, N. Stanley-Wall, J. Parkhill, S. J. Peacock, T. Palmer, M.  
677 T. G. Holden, The Ess/Type VII secretion system of *Staphylococcus aureus* shows unexpected genetic  
678 diversity. *BMC Genomics*. **17**, 222 (2016).
- 679 31. K. H. Schleifer, R. Kilpper-Bälz, L. A. Devriese, *Staphylococcus arlettae* sp. nov., *S. equorum* sp. nov. and  
680 *S. k1oosii* sp. nov.: Three New Coagulase-Negative, Novobiocin-Resistant Species from Animals.  
681 *Systematic and Applied Microbiology*. **5**, 501–509 (1984).
- 682 32. L. Bowman, T. Palmer, The Type VII Secretion System of *Staphylococcus*. *Annu Rev Microbiol*. **75**, 471–  
683 494 (2021).
- 684 33. A. Kengmo Tchoupa, K. E. Watkins, R. A. Jones, A. Kuroki, M. T. Alam, S. Perrier, Y. Chen, M.  
685 Unnikrishnan, The type VII secretion system protects *Staphylococcus aureus* against antimicrobial host fatty  
686 acids. *Sci Rep*. **10**, 14838 (2020).
- 687 34. J. A. Lees, M. Galardini, S. D. Bentley, J. N. Weiser, J. Corander, pyseer: a comprehensive tool for  
688 microbial pangenome-wide association studies. *Bioinformatics*. **34**, 4310–4312 (2018).
- 689 35. M. Gajdiss, I. R. Monk, U. Bertsche, J. Kienemund, T. Funk, A. Dietrich, M. Hort, E. Sib, T. P. Stinear, G.  
690 Bierbaum, YycH and YycI Regulate Expression of *Staphylococcus aureus* Autolysins by Activation of  
691 WalRK Phosphorylation. *Microorganisms*. **8**, 870 (2020).
- 692 36. M. A. Anthony, S. F. Bender, M. G. A. van der Heijden, Enumerating soil biodiversity. *Proceedings of the*  
693 *National Academy of Sciences*. **120**, e2304663120 (2023).
- 694 37. O. Popa, T. Dagan, Trends and barriers to lateral gene transfer in prokaryotes. *Curr Opin Microbiol*. **14**,  
695 615–623 (2011).
- 696 38. D. Espadinha, R. G. Sobral, C. I. Mendes, G. Méric, S. K. Sheppard, J. A. Carriço, H. de Lencastre, M.  
697 Miragaia, Distinct Phenotypic and Genomic Signatures Underlie Contrasting Pathogenic Potential of  
698 *Staphylococcus epidermidis* Clonal Lineages. *Frontiers in Microbiology*. **10** (2019) (available at  
699 <https://www.frontiersin.org/articles/10.3389/fmicb.2019.01971>).
- 700 39. S. K. Sheppard, L. Cheng, G. Méric, C. P. A. de Haan, A.-K. Llaena, P. Marttinen, A. Vidal, A. Ridley, F.  
701 Clifton-Hadley, T. R. Connor, N. J. C. Strachan, K. Forbes, F. M. Colles, K. A. Jolley, S. D. Bentley, M. C. J.  
702 Maiden, M.-L. Hänninen, J. Parkhill, W. P. Hanage, J. Corander, Cryptic ecology among host generalist  
703 *Campylobacter jejuni* in domestic animals. *Molecular Ecology*. **23**, 2442–2451 (2014).
- 704 40. L. L. Bohr, T. D. Mortimer, C. S. Pepperell, Lateral Gene Transfer Shapes Diversity of *Gardnerella* spp.  
705 *Frontiers in Cellular and Infection Microbiology*. **10** (2020) (available at  
706 <https://www.frontiersin.org/articles/10.3389/fcimb.2020.00293>).
- 707 41. M. E. Rupp, D. E. Soper, G. L. Archer, Colonization of the female genital tract with *Staphylococcus*  
708 *saprophyticus*. *J Clin Microbiol*. **30**, 2975–2979 (1992).
- 709 42. R. H. Latham, K. Running, W. E. Stamm, Urinary tract infections in young adult women caused by  
710 *Staphylococcus saprophyticus*. *JAMA*. **250**, 3063–3066 (1983).
- 711 43. R. Colodner, S. Ken-Dror, B. Kavenshtock, B. Chazan, R. Raz, Epidemiology and clinical characteristics of  
712 patients with *Staphylococcus saprophyticus* bacteriuria in Israel. *Infection*. **34**, 278–281 (2006).
- 713 44. S. Ferry, L. G. Burman, B. Mattsson, Urinary tract infection in primary health care in northern Sweden. I.  
714 Epidemiology. *Scand J Prim Health Care*. **5**, 123–128 (1987).

- 715 45. C. von Eiff, K. Becker, K. Machka, H. Stammer, G. Peters, Nasal Carriage as a Source of *Staphylococcus aureus* Bacteremia. *New England Journal of Medicine*. **344**, 11–16 (2001).  
716
- 717 46. R. Thänert, K. A. Reske, T. Hink, M. A. Wallace, B. Wang, D. J. Schwartz, S. Seiler, C. Cass, C.-A. D.  
718 Burnham, E. R. Dubberke, J. H. Kwon, G. Dantas, for the CDC Prevention Epicenter Program, *mBio*, in  
719 press, doi:10.1128/mbio.01977-19.
- 720 47. V. Chaudhry, P. B. Patil, Genomic investigation reveals evolution and lifestyle adaptation of endophytic  
721 *Staphylococcus epidermidis*. *Scientific Reports*. **6**, 1–11 (2016).
- 722 48. L. Epping, B. Walther, R. M. Piro, M.-T. Knüver, C. Huber, A. Thürmer, A. Flieger, A. Fruth, N. Janecko, L.  
723 H. Wieler, K. Stingl, T. Semmler, Genome-wide insights into population structure and host specificity of  
724 *Campylobacter jejuni*. *Sci Rep*. **11**, 10358 (2021).
- 725 49. C. T. Parker, K. K. Cooper, F. Schiaffino, W. G. Miller, S. Huynh, H. K. Gray, M. P. Olortegui, P. G.  
726 Bardales, D. R. Trigo, P. Penataro-Yori, M. N. Kosek, Genomic Characterization of *Campylobacter jejuni*  
727 Adapted to the Guinea Pig (*Cavia porcellus*) Host. *Frontiers in Cellular and Infection Microbiology*. **11** (2021)  
728 (available at <https://www.frontiersin.org/articles/10.3389/fcimb.2021.607747>).
- 729 50. S. K. Sheppard, F. Colles, J. Richardson, A. J. Cody, R. Elson, A. Lawson, G. Brick, R. Meldrum, C. L. Little,  
730 R. J. Owen, M. C. J. Maiden, N. D. McCarthy, Host Association of *Campylobacter* Genotypes Transcends  
731 Geographic Variation. *Applied and Environmental Microbiology*. **76**, 5269–5277 (2010).
- 732 51. T. H. Bell, T. Bell, Many roads to bacterial generalism. *FEMS Microbiology Ecology*. **97**, fiae240 (2021).
- 733 52. M. L. Burts, W. A. Williams, K. DeBord, D. M. Missiakas, EsxA and EsxB are secreted by an ESAT-6-like  
734 system that is required for the pathogenesis of *Staphylococcus aureus* infections. *PNAS*. **102**, 1169–1174  
735 (2005).
- 736 53. M. Bobrovskyy, X. Chen, D. Missiakas, The Type 7b Secretion System of *S. aureus* and Its Role in  
737 Colonization and Systemic Infection. *Infection and Immunity*. **91**, e00015-23 (2023).
- 738 54. M. Cruciani, M. P. Etna, R. Camilli, E. Giacomini, Z. A. Percario, M. Severa, S. Sandini, F. Rizzo, V. Brandi,  
739 G. Balsamo, F. Polticelli, E. Affabris, A. Pantosti, F. Bagnoli, E. M. Coccia, *Staphylococcus aureus* Esx  
740 Factors Control Human Dendritic Cell Functions Conditioning Th1/Th17 Response. *Front Cell Infect*  
741 *Microbiol*. **7**, 330 (2017).
- 742 55. M. Cobirka, V. Tancin, P. Slama, Epidemiology and Classification of Mastitis. *Animals (Basel)*. **10**, 2212  
743 (2020).
- 744 56. L. K. Chung, S. Sahibzada, H. C. Annandale, I. D. Robertson, F. W. Waichigo, M. S. Tufail, J. A. Aleri,  
745 Bacterial pathogens associated with clinical and subclinical mastitis in a Mediterranean pasture-based dairy  
746 production system of Australia. *Res Vet Sci*. **141**, 103–109 (2021).
- 747 57. J. P. Mpatwenumugabo, L. C. Bebora, G. C. Gitao, V. A. Mobegi, B. Iraguha, O. Kamana, B. Shumbusho,  
748 Prevalence of Subclinical Mastitis and Distribution of Pathogens in Dairy Farms of Rubavu and Nyabihu  
749 Districts, Rwanda. *Journal of Veterinary Medicine*. **2017**, e8456713 (2017).
- 750 58. J. B. Ndahetuye, Y. Persson, A.-K. Nyman, M. Tukei, M. P. Ongol, R. Båge, Aetiology and prevalence of  
751 subclinical mastitis in dairy herds in peri-urban areas of Kigali in Rwanda. *Trop Anim Health Prod*. **51**, 2037–  
752 2044 (2019).
- 753 59. Y. Persson, A.-K. J. Nyman, U. Grönlund-Andersson, Etiology and antimicrobial susceptibility of udder  
754 pathogens from cases of subclinical mastitis in dairy cows in Sweden. *Acta Veterinaria Scandinavica*. **53**, 36  
755 (2011).

- 756 60. A. Duse, K. Persson-Waller, K. Pedersen, Microbial Aetiology, Antibiotic Susceptibility and Pathogen-  
757 Specific Risk Factors for Udder Pathogens from Clinical Mastitis in Dairy Cows. *Animals (Basel)*. **11**, 2113  
758 (2021).
- 759 61. L. R. Joyce, M. A. Youngblom, H. Cormaty, E. Gartstein, K. E. Barber, R. L. Akins, C. S. Pepperell, K. L.  
760 Palmer, Comparative Genomics of *Streptococcus oralis* Identifies Large Scale Homologous Recombination  
761 and a Genetic Variant Associated with Infection. *mSphere*. **7**, e00509-22 (2022).
- 762 62. E. V. Sokurenko, R. Gomulkiewicz, D. E. Dykhuizen, Source–sink dynamics of virulence evolution. *Nat Rev*  
763 *Microbiol.* **4**, 548–555 (2006).
- 764 63. J. P. Scharsack, H. Schweyen, A. M. Schmidt, J. Dittmar, T. B. Reusch, J. Kurtz, Population genetic  
765 dynamics of three-spined sticklebacks (*Gasterosteus aculeatus*) in anthropogenic altered habitats. *Ecol*  
766 *Evol.* **2**, 1122–1143 (2012).
- 767 64. S. Chattopadhyay, M. Feldgarden, S. J. Weissman, D. E. Dykhuizen, G. van Belle, E. V. Sokurenko,  
768 Haplotype Diversity in “Source-Sink” Dynamics of *Escherichia coli* Urovirulence. *J Mol Evol.* **64**, 204–214  
769 (2007).
- 770 65. J. A. Gilbert, B. Stephens, Microbiology of the built environment. *Nat Rev Microbiol.* **16**, 661–670 (2018).
- 771 66. P. Hedman, O. Ringertz, B. Eriksson, P. Kvarnfor, M. Andersson, L. Bengtsson, K. Olsson, *Staphylococcus*  
772 *saprophyticus* found to be a common contaminant of food. *J Infect.* **21**, 11–19 (1990).
- 773 67. Y. E. Dessouky, S. W. Elsayed, N. A. Abdelsalam, N. A. Saif, A. Álvarez-Ordóñez, M. Elhadidy, Genomic  
774 insights into zoonotic transmission and antimicrobial resistance in *Campylobacter jejuni* from farm to fork: a  
775 one health perspective. *Gut Pathogens.* **14**, 44 (2022).
- 776 68. L. Mughini-Gras, R. Pijnacker, C. Coipan, A. C. Mulder, A. Fernandes Veludo, S. de Rijk, A. H. A. M. van  
777 Hoek, R. Buij, G. Muskens, M. Koene, K. Veldman, B. Duim, L. van der Graaf-van Bloois, C. van der  
778 Weijden, S. Kuiling, A. Verbruggen, J. van der Giessen, M. Opsteegh, M. van der Voort, G. A. A. Castelijin,  
779 F. M. Schets, H. Blaak, J. A. Wagenaar, A. L. Zomer, E. Franz, Sources and transmission routes of  
780 campylobacteriosis: A combined analysis of genome and exposure data. *Journal of Infection.* **82**, 216–226  
781 (2021).
- 782 69. B. Pascoe, F. Schiaffino, S. Murray, G. Méric, S. C. Bayliss, M. D. Hitchings, E. Mourkas, J. K. Calland, R.  
783 Burga, P. P. Yori, K. A. Jolley, K. K. Cooper, C. T. Parker, M. P. Olortegui, M. N. Kosek, S. K. Sheppard,  
784 Genomic epidemiology of *Campylobacter jejuni* associated with asymptomatic pediatric infection in the  
785 Peruvian Amazon. *PLOS Neglected Tropical Diseases.* **14**, e0008533 (2020).
- 786 70. K. G. Kuhn, A. K. Hvass, A. H. Christiansen, S. Ethelberg, S. A. Cowan, Sexual Contact as Risk Factor for  
787 *Campylobacter* Infection, Denmark. *Emerg Infect Dis.* **27**, 1133–1140 (2021).
- 788 71. E. G. Evers, H. Blaak, R. A. Hamidjaja, R. de Jonge, F. M. Schets, A QMRA for the Transmission of ESBL-  
789 Producing *Escherichia coli* and *Campylobacter* from Poultry Farms to Humans Through Flies. *Risk Analysis.*  
790 **36**, 215–227 (2016).
- 791 72. M. Cousins, J. M. Sargeant, D. Fisman, A. L. Greer, Modelling the transmission dynamics of *Campylobacter*  
792 in Ontario, Canada, assuming house flies, *Musca domestica*, are a mechanical vector of disease  
793 transmission. *R Soc Open Sci.* **6**, 181394 (2019).
- 794 73. C. M. Liu, M. Aziz, D. E. Park, Z. Wu, M. Stegger, M. Li, Y. Wang, K. Schmidlin, T. J. Johnson, B. J. Koch,  
795 B. A. Hungate, L. Nordstrom, L. Gauld, B. Weaver, D. Rolland, S. Statham, B. Hall, S. Sariya, G. S. Davis,  
796 P. S. Keim, J. R. Johnson, L. B. Price, Using source-associated mobile genetic elements to identify zoonotic  
797 extraintestinal *E. coli* infections. *One Health.* **16**, 100518 (2023).

- 798 74. S. Andrews, FastQC: A Quality Control tool for High Throughput Sequence Data (2010).
- 799 75. A. M. Bolger, M. Lohse, B. Usadel, Trimmomatic: a flexible trimmer for Illumina sequence data.  
800 *Bioinformatics*. **30**, 2114–2120 (2014).
- 801 76. D. E. Wood, J. Lu, B. Langmead, Improved metagenomic analysis with Kraken 2. *Genome Biology*. **20**, 257  
802 (2019).
- 803 77. J. Lu, N. Rincon, D. E. Wood, F. P. Breitwieser, C. Pockrandt, B. Langmead, S. L. Salzberg, M. Steinegger,  
804 Metagenome analysis using the Kraken software suite. *Nat Protoc*. **17**, 2815–2839 (2022).
- 805 78. A. Bankevich, S. Nurk, D. Antipov, A. A. Gurevich, M. Dvorkin, A. S. Kulikov, V. M. Lesin, S. I. Nikolenko, S.  
806 Pham, A. D. Prjibelski, A. V. Pyshkin, A. V. Sirotkin, N. Vyahhi, G. Tesler, M. A. Alekseyev, P. A. Pevzner,  
807 SPAdes: A New Genome Assembly Algorithm and Its Applications to Single-Cell Sequencing. *J Comput*  
808 *Biol*. **19**, 455–477 (2012).
- 809 79. A. Gurevich, V. Saveliev, N. Vyahhi, G. Tesler, QUASt: quality assessment tool for genome assemblies.  
810 *Bioinformatics*. **29**, 1072–1075 (2013).
- 811 80. T. Seemann, Prokka: rapid prokaryotic genome annotation. *Bioinformatics*, btu153 (2014).
- 812 81. H. Li, Aligning sequence reads, clone sequences and assembly contigs with BWA-MEM. *arXiv:1303.3997*  
813 [*q-bio*] (2013) (available at <http://arxiv.org/abs/1303.3997>).
- 814 82. H. Li, B. Handsaker, A. Wysoker, T. Fennell, J. Ruan, N. Homer, G. Marth, G. Abecasis, R. Durbin, 1000  
815 Genome Project Data Processing Subgroup, The Sequence Alignment/Map format and SAMtools.  
816 *Bioinformatics*. **25**, 2078–2079 (2009).
- 817 83. B. J. Walker, T. Abeel, T. Shea, M. Priest, A. Abouelliel, S. Sakthikumar, C. A. Cuomo, Q. Zeng, J.  
818 Wortman, S. K. Young, A. M. Earl, Pilon: An Integrated Tool for Comprehensive Microbial Variant Detection  
819 and Genome Assembly Improvement. *PLOS ONE*. **9**, e112963 (2014).
- 820 84. K. Okonechnikov, A. Conesa, F. García-Alcalde, Qualimap 2: advanced multi-sample quality control for  
821 high-throughput sequencing data. *Bioinformatics*. **32**, 292–294 (2016).
- 822 85. G. Marçais, A. L. Delcher, A. M. Phillippy, R. Coston, S. L. Salzberg, A. Zimin, MUMmer4: A fast and  
823 versatile genome alignment system. *PLOS Computational Biology*. **14**, e1005944 (2018).
- 824 86. A. J. Page, C. A. Cummins, M. Hunt, V. K. Wong, S. Reuter, M. T. G. Holden, M. Fookes, D. Falush, J. A.  
825 Keane, J. Parkhill, Roary: rapid large-scale prokaryote pan genome analysis. *Bioinformatics*. **31**, 3691–3693  
826 (2015).
- 827 87. G. Méric, K. Yahara, L. Mageiros, B. Pascoe, M. C. J. Maiden, K. A. Jolley, S. K. Sheppard, A Reference  
828 Pan-Genome Approach to Comparative Bacterial Genomics: Identification of Novel Epidemiological Markers  
829 in Pathogenic *Campylobacter*. *PLoS One*. **9**, e92798 (2014).
- 830 88. A. Stamatakis, RAxML version 8: a tool for phylogenetic analysis and post-analysis of large phylogenies.  
831 *Bioinformatics*. **30**, 1312–1313 (2014).
- 832 89. B. D. Ondov, T. J. Treangen, P. Melsted, A. B. Mallonee, N. H. Bergman, S. Koren, A. M. Phillippy, Mash:  
833 fast genome and metagenome distance estimation using MinHash. *Genome Biology*. **17**, 132 (2016).
- 834 90. C. Jain, L. M. Rodriguez-R, A. M. Phillippy, K. T. Konstantinidis, S. Aluru, High throughput ANI analysis of  
835 90K prokaryotic genomes reveals clear species boundaries. *Nat Commun*. **9**, 5114 (2018).

- 836 91. S. De Mita, M. Siol, EggLib: processing, analysis and simulation tools for population genetics and genomics.  
837 *BMC Genetics*. **13**, 27 (2012).
- 838 92. Z. Yang, R. Nielsen, Estimating Synonymous and Nonsynonymous Substitution Rates Under Realistic  
839 Evolutionary Models. *Mol Biol Evol*. **17**, 32–43 (2000).
- 840 93. Z. Yang, PAML: a program package for phylogenetic analysis by maximum likelihood. *Computer  
841 applications in the biosciences : CABIOS*. **13**, 555–556 (1997).
- 842 94. H. A. Thorpe, S. C. Bayliss, L. D. Hurst, E. J. Feil, Comparative Analyses of Selection Operating on  
843 Nontranslated Intergenic Regions of Diverse Bacterial Species. *Genetics*. **206**, 363–376 (2017).
- 844 95. H. A. Thorpe, S. C. Bayliss, S. K. Sheppard, E. J. Feil, Piggy: a rapid, large-scale pan-genome analysis tool  
845 for intergenic regions in bacteria. *GigaScience*. **7**, giy015 (2018).
- 846 96. A. J. Page, B. Taylor, A. J. Delaney, J. Soares, T. Seemann, J. A. Keane, S. R. Harris, SNP-sites: rapid  
847 efficient extraction of SNPs from multi-FASTA alignments. *Microbial Genomics*. **2** (2016),  
848 doi:10.1099/mgen.0.000056.
- 849 97. M. M. Saber, B. J. Shapiro, Benchmarking bacterial genome-wide association study methods using  
850 simulated genomes and phenotypes. *Microbial Genomics*. **6**, e000337 (2020).
- 851 98. P. Cingolani, A. Platts, L. L. Wang, M. Coon, T. Nguyen, L. Wang, S. J. Land, X. Lu, D. M. Ruden, A  
852 program for annotating and predicting the effects of single nucleotide polymorphisms, SnpEff. *Fly (Austin)*.  
853 **6**, 80–92 (2012).

854  
855

856 **Supplemental Figures & Tables**

857

858 **Table S1: *S. saprophyticus* pangenome dominated by rare accessory gene content.** Output of pangenome  
859 analyses of full sample, Clade 1 and Clade 2.

| <b>Sample</b> | <b>N</b> | <b>Total Genes</b> | <b>Core Genes</b><br>(≥ 99%) | <b>Soft Core Genes</b><br>(95-99%) | <b>Shell Genes</b><br>(15-95%) | <b>Cloud Genes</b><br>(< 15%) |
|---------------|----------|--------------------|------------------------------|------------------------------------|--------------------------------|-------------------------------|
| All           | 780      | 14057              | 2105                         | 65                                 | 454                            | 11433                         |
| Clade 1       | 646      | 13383              | 2123                         | 94                                 | 375                            | 10791                         |
| Clade 2       | 134      | 5709               | 2215                         | 76                                 | 325                            | 3093                          |

860

861



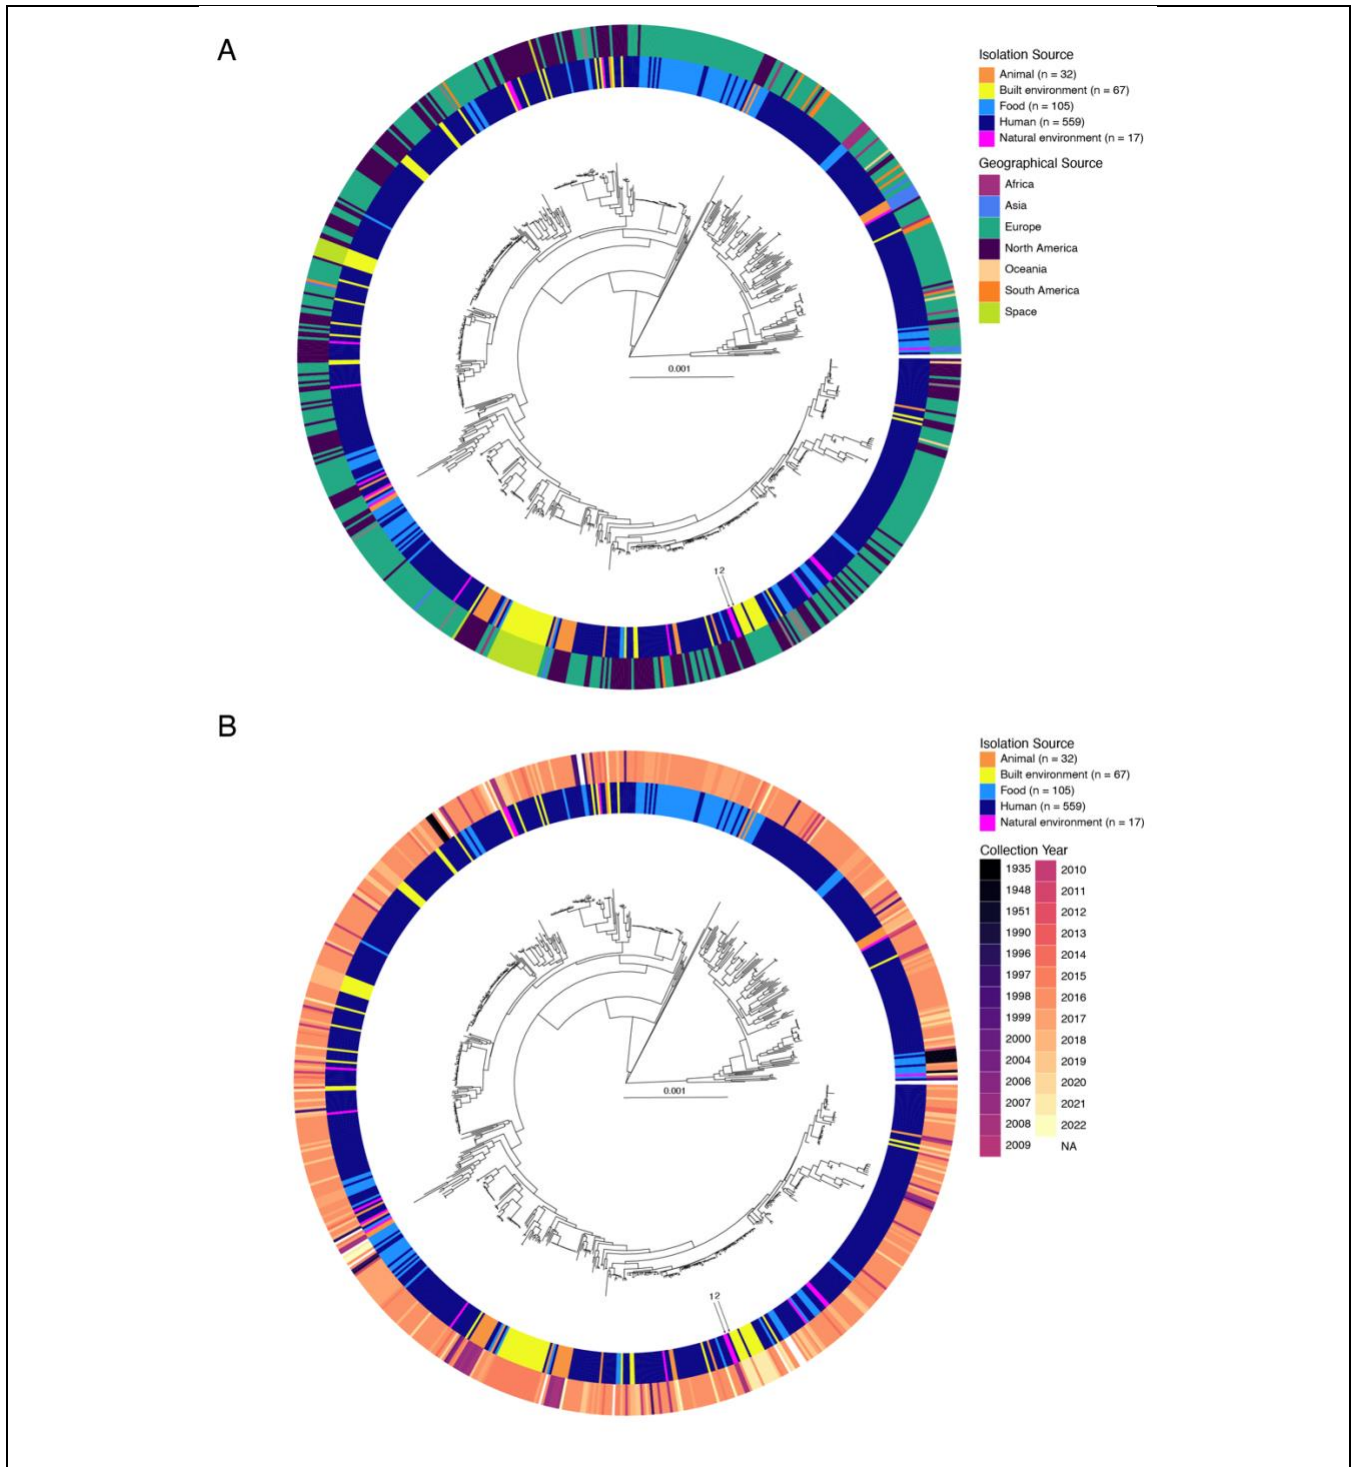

**Figure S1: Lack of geographic or temporal structure on the *S. saprophyticus* phylogeny.** A) Core genome phylogeny is plotted with isolation source (inner ring) and geographic source (outer ring). B) Core genome phylogeny is plotted with isolation source (inner ring) and isolation year (outer ring). An example of two closely related isolates that illustrate the lack of geographic or temporal structure are marked on A and B: 1) 20-05 (Washington Pacific Ocean, 2008) and 2) SRR19995418 (Norwegian bathroom, 2021) are separated by only 47 core genome SNPs ( $5e-5$  SNPs per site).

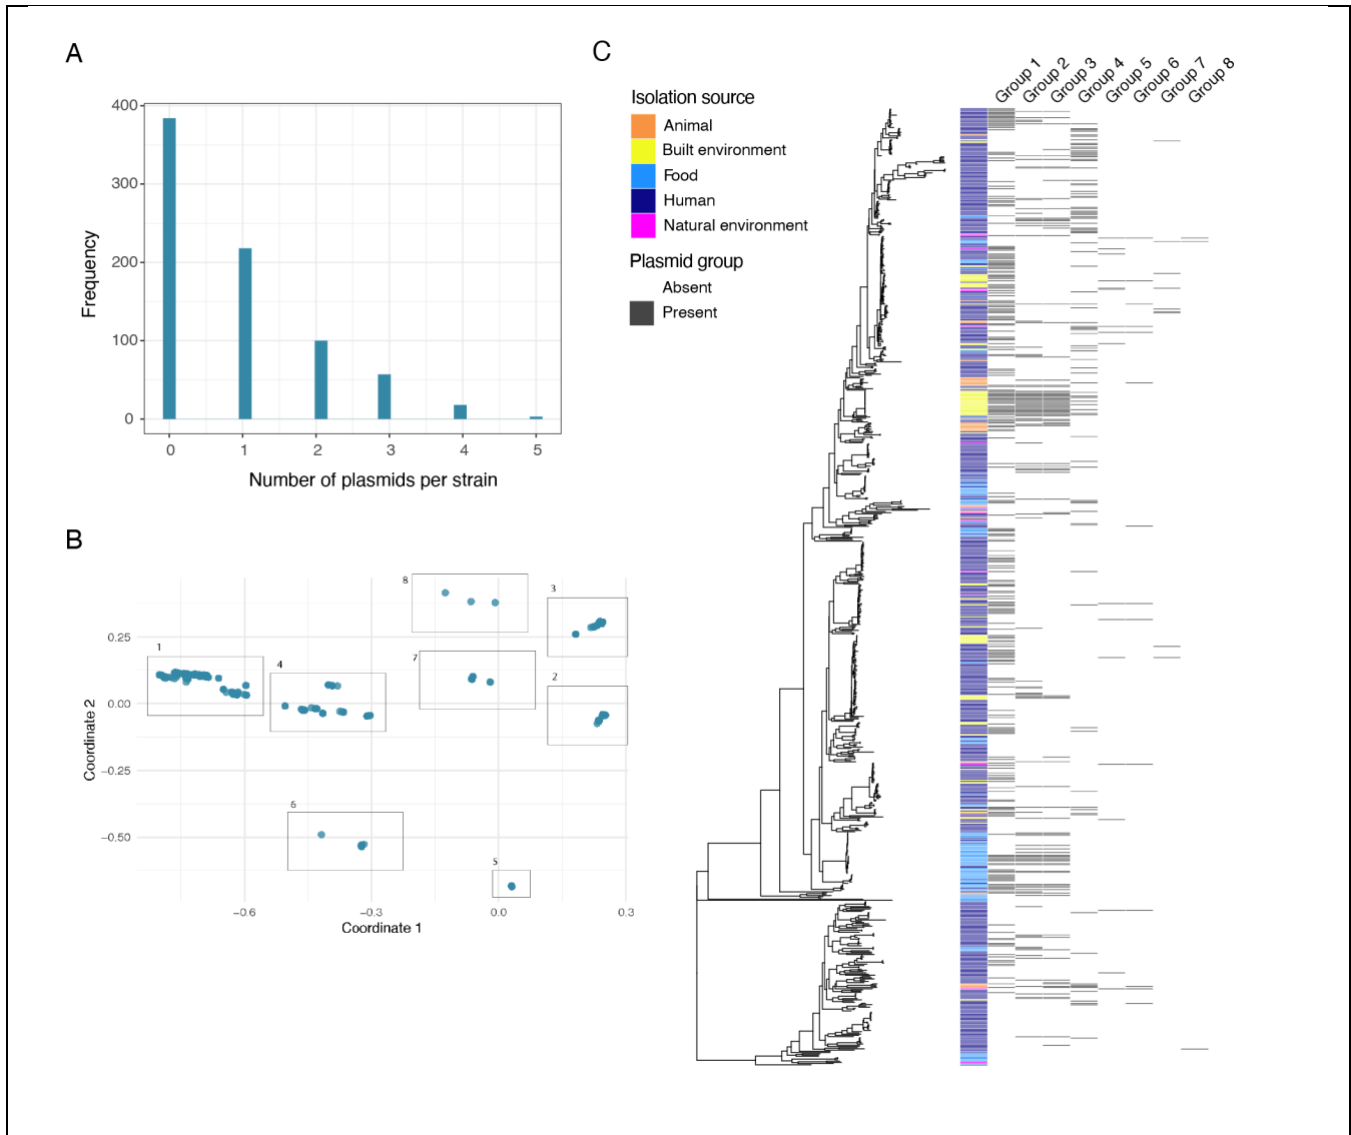

**Figure S2: *S. saprophyticus* plasmids are diverse in number, sequence, and phylogenetic distribution.**

A) Plasmid counts per isolate as determined by the number of unique contigs mapping to plasmids in our plasmid database (see Methods). In about 50% of isolates, nothing resembling any previously sequenced plasmid was identified. The other 50% of isolates had between 1 and 5 plasmids, with only 4/780 strains carrying 5 plasmids. B) Multi-dimensional scaling (MDS) was performed on all putative plasmid sequences and plasmids were grouped into eight sequence groups. C) Plasmid presence/absence broken down by sequence group is plotted alongside the core genome phylogeny illustrating that plasmid sequence groups are generally distributed throughout the phylogeny

863

864

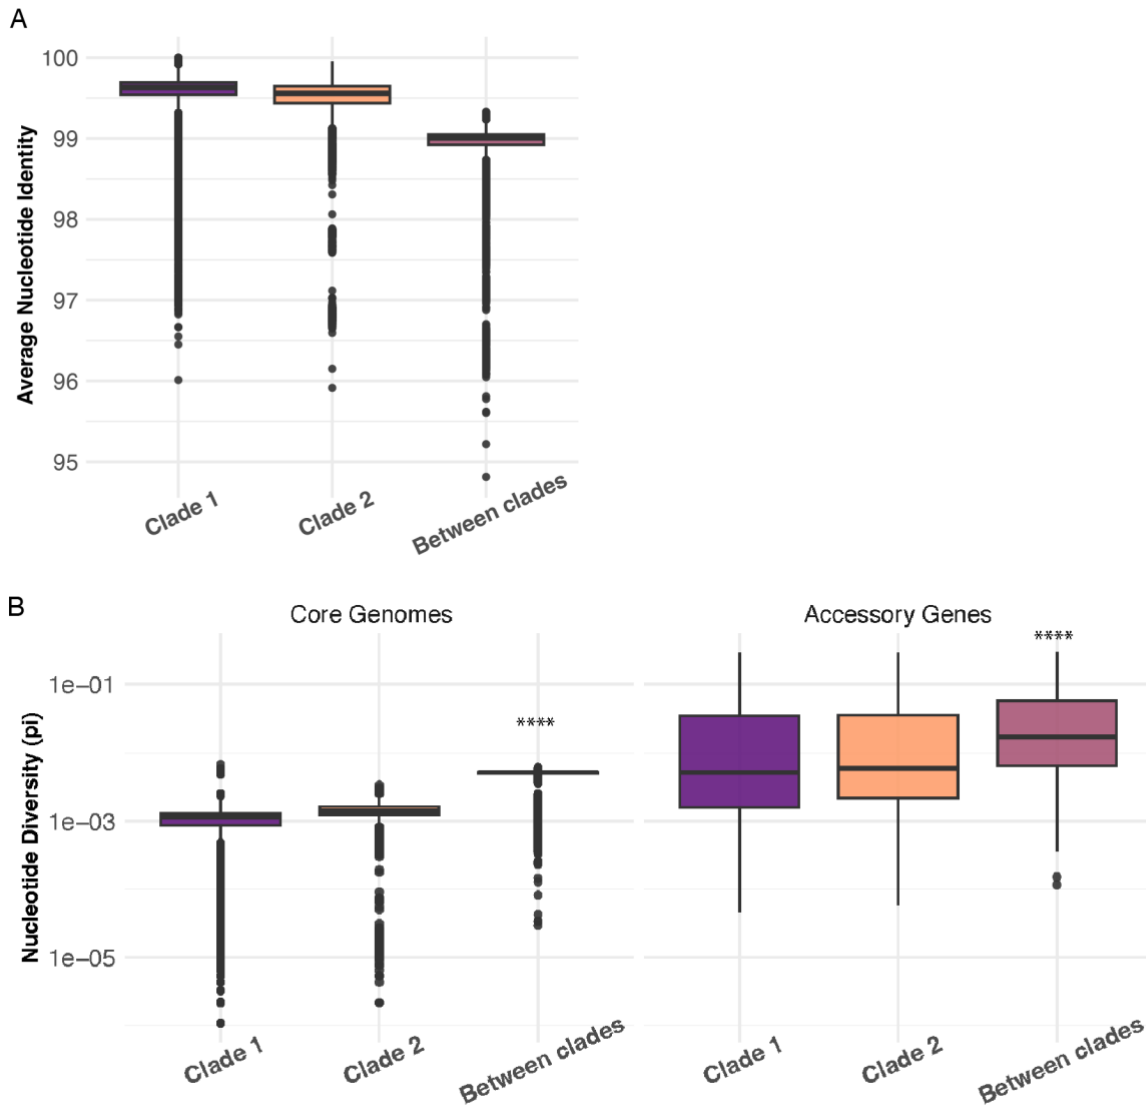

**Figure S3: *S. saprophyticus* clades are genetically distinct at the core and accessory genome levels. A)** Average nucleotide identity (ANI) calculated from whole-genome alignments. ANI values from isolates of different clades range from 95-99%, which is above the threshold that would distinguish them as different sub-species. **B)** Nucleotide diversity ( $\pi$ ) calculated for core genomes (left) and accessory genes (right). Higher diversity values of between-clade pairs indicate barriers to horizontal transfer between clades.

865

866

867

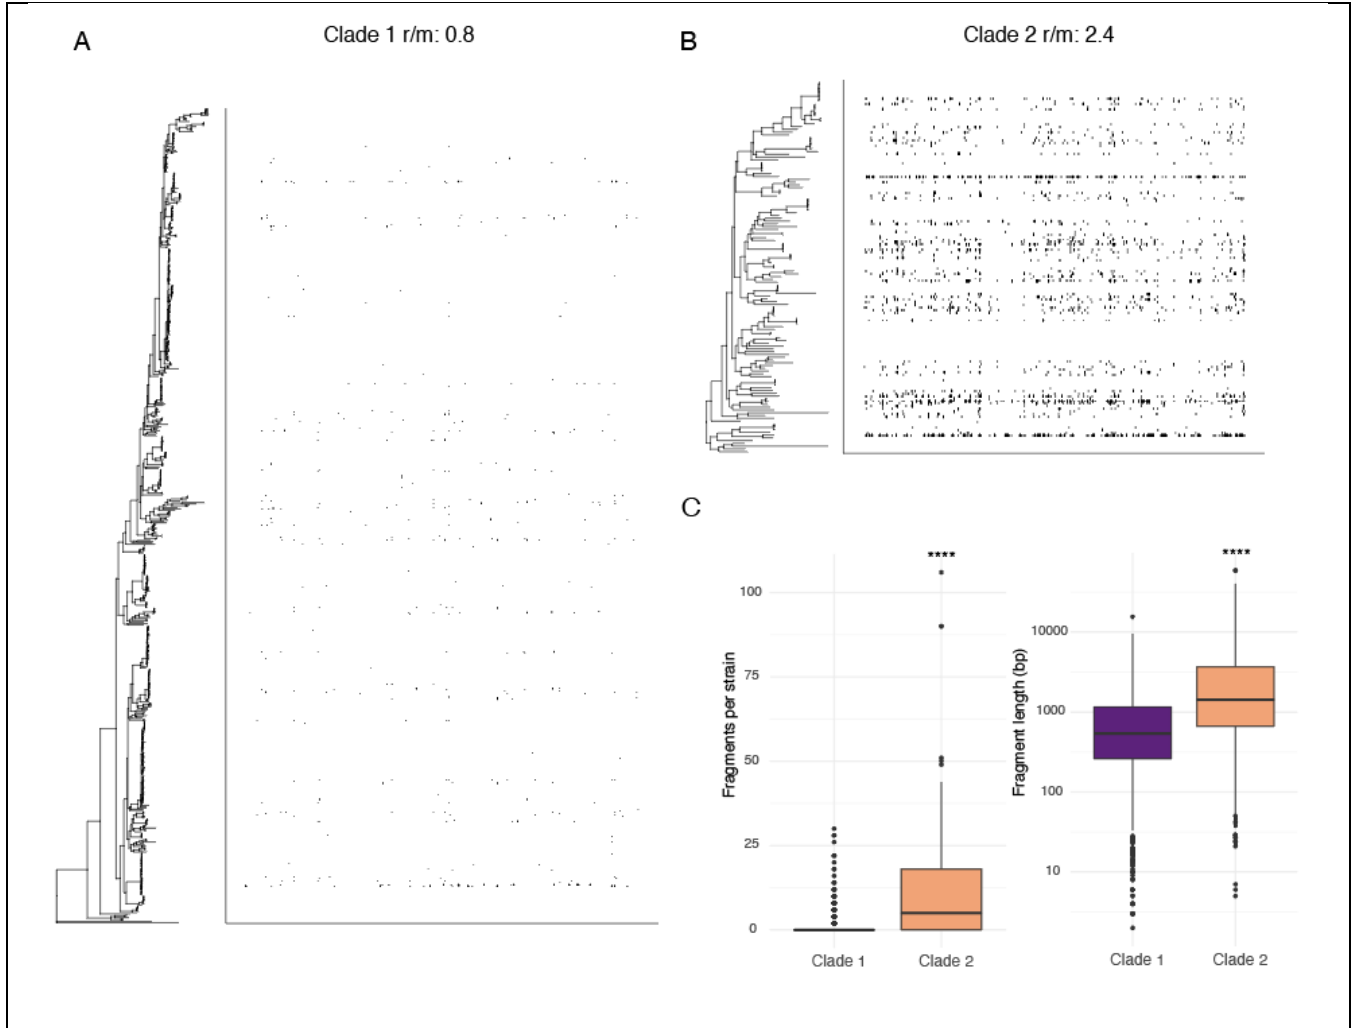

**Figure S4: Recombination patterns differ between clades of *S. saprophyticus*.** Annotation of recombinant fragments and calculation of  $r/m$  values was performed with ClonalFrameML. Plots of recombinant fragments in the core genomes of Clade 1 (A) and Clade 2 (B) show that the core genome of Clade 2 isolates is more affected by recombination. C) Recombinant fragments are significantly more prevalent and significantly longer in Clade 2 isolates (Mann Whitney U test with Bonferroni correction, \*\*\*\*:  $p < 0.0001$ ).

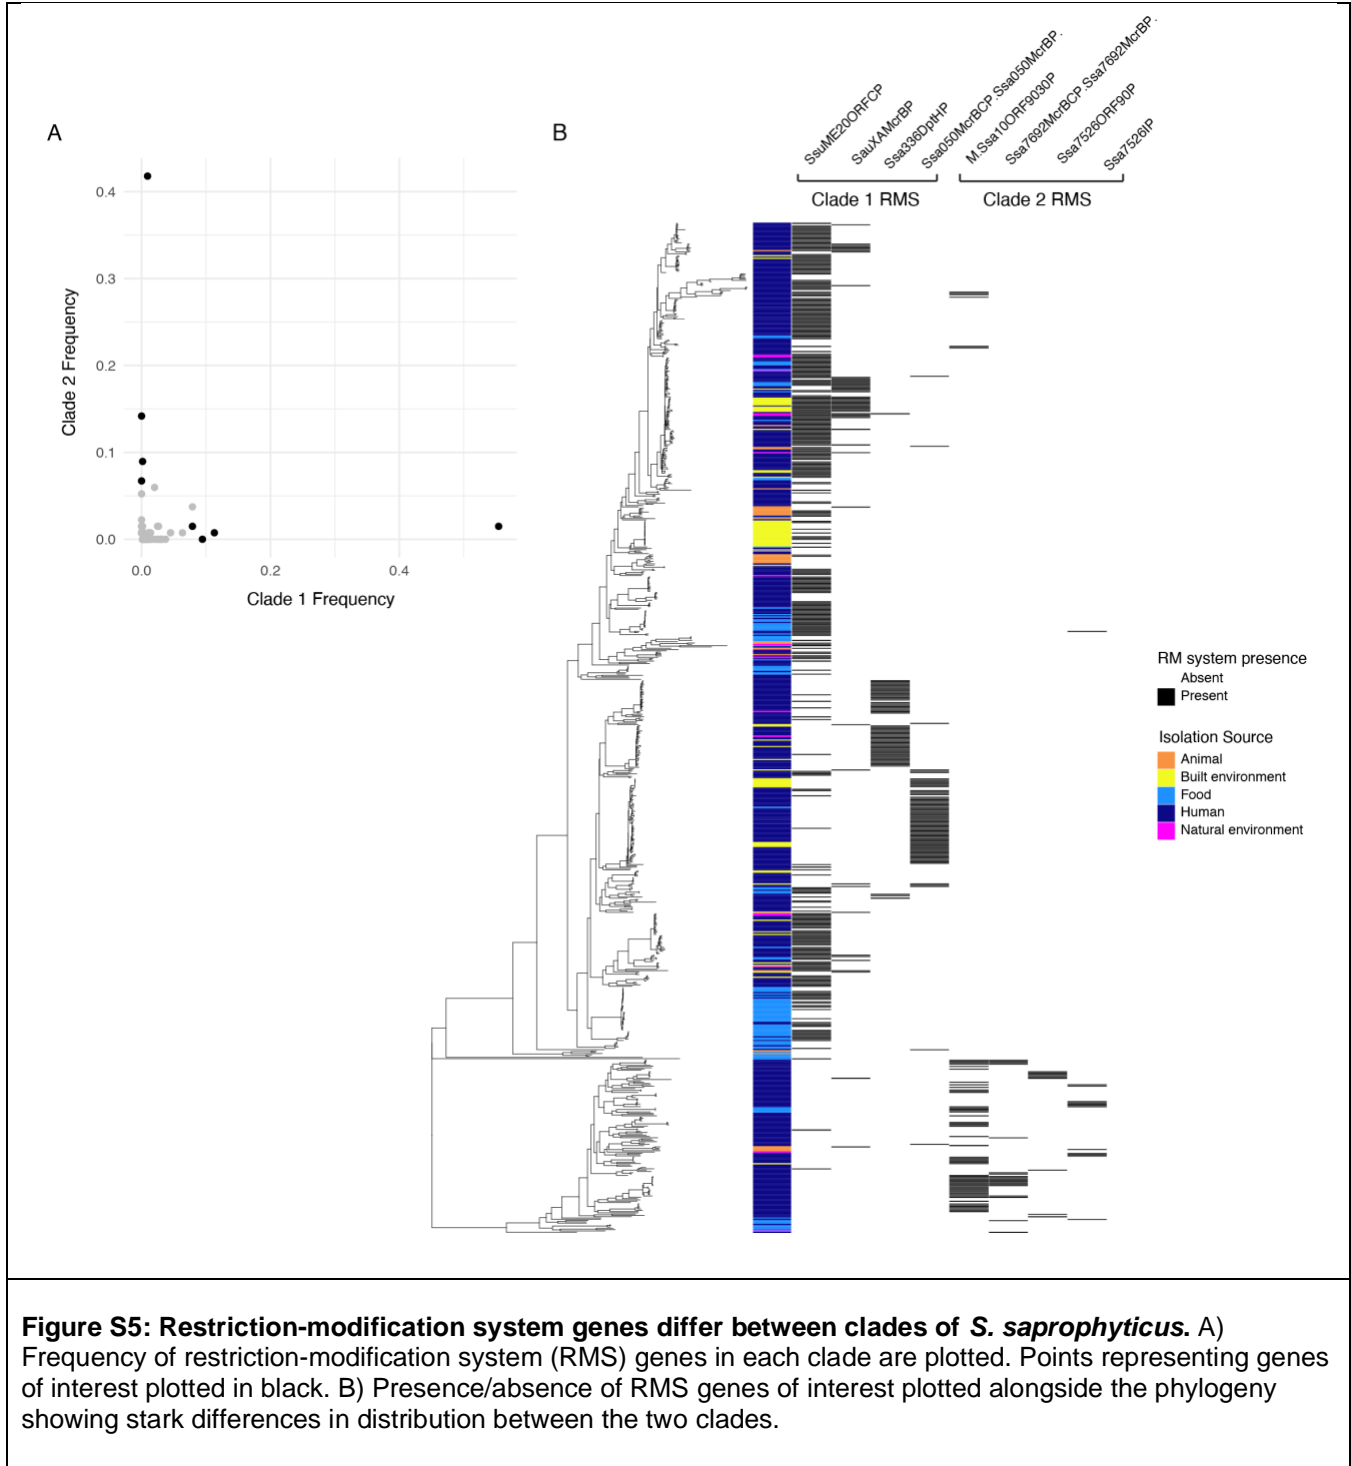

**Figure S5: Restriction-modification system genes differ between clades of *S. saprophyticus*.** A) Frequency of restriction-modification system (RMS) genes in each clade are plotted. Points representing genes of interest plotted in black. B) Presence/absence of RMS genes of interest plotted alongside the phylogeny showing stark differences in distribution between the two clades.

869

870

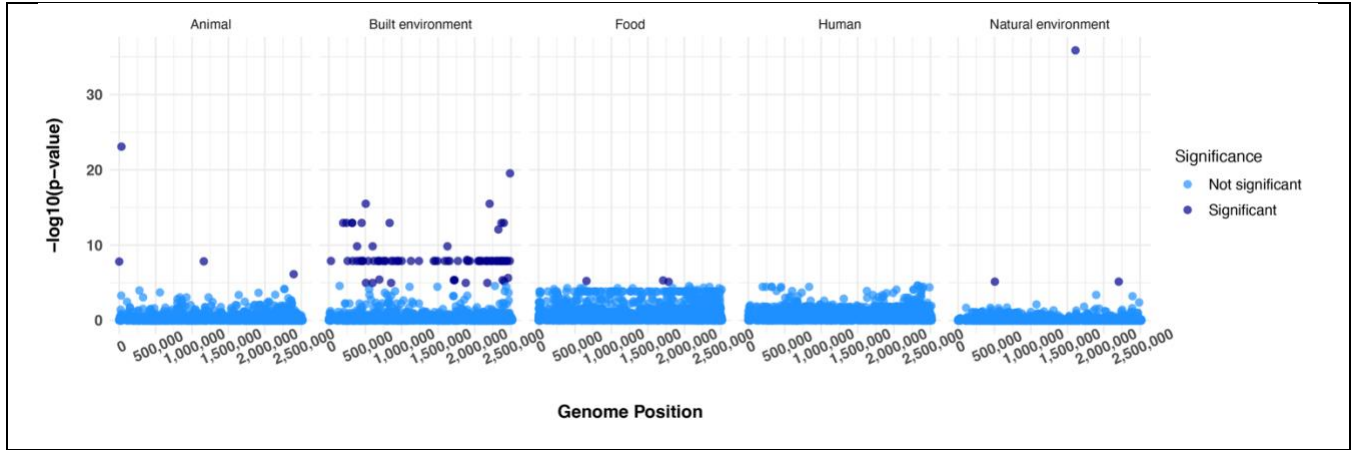

**Figure S6: Few core genome variants associated with niche adaptation.** GWAS on all SNPs from core genome alignment ( $n = 6,013$ ) was performed using pySEER with a mixed model. SNPs identified as significantly associated with a particular isolation source are in dark blue, non-significant in light blue. Isolates from built environments have a much higher number of associated variants: 80% of all significant SNPs were associated with built environments.

871

872

873  
874  
875  
876

**Table S2: Variants from whole-genome alignment significantly associated with isolation source.** For intergenic variants, the downstream gene is listed. Gene ID and product refer to the annotations of the reference genome found on NCBI (GCA\_000010125.1).

| Position | Association  | Mutation Type  | Gene ID | COG | Product                                                   |
|----------|--------------|----------------|---------|-----|-----------------------------------------------------------|
| 30938    | Animal       | synonymous     | SSP0023 | S   | 2CRS activity regulator YychH                             |
| 195852   | Built env.   | non-synonymous | SSP0174 | S   | nickel pincer cofactor biosynthesis protein LarC          |
| 240768   | Built env.   | non-synonymous | SSP0212 | -   | hypothetical protein                                      |
| 319124   | Built env.   | synonymous     | SSP0294 | E   | aminotransferase                                          |
| 320373   | Built env.   | synonymous     | SSP0295 | CH  | D-2-hydroxyacid dehydrogenase                             |
| 386784   | Built env.   | intergenic     | SSP0353 | E   | aminotransferase                                          |
| 449952   | Built env.   | non-synonymous | SSP0411 | G   | gluconokinase                                             |
| 505482   | Built env.   | missense       | SSP0467 | S   | DUF805 domain                                             |
| 600739   | Built env.   | synonymous     | SSP0564 | S   | ABC-type multidrug transport system ATPase                |
| 833938   | Built env.   | synonymous     | SSP0807 | E   | alanine racemase                                          |
| 1627287  | Built env.   | non-synonymous | SSP1559 | L   | primosomal protein                                        |
| 1896024  | Built env.   | synonymous     | SSP1814 | E   | argininosuccinate synthase                                |
| 2206045  | Built env.   | synonymous     | SSP2142 | EGP | proline betaine transporter                               |
| 2326532  | Built env.   | synonymous     | SSP2252 | S   | polysaccharide biosynthesis protein                       |
| 2368785  | Built env.   | non-synonymous | SSP2284 | E   | glutamate synthase large subunit                          |
| 2401511  | Built env.   | non-synonymous | SSP2320 | -   | hypothetical protein                                      |
| 657433   | Food         | intergenic     | SSP0618 | P   | ABC-type amino acid transport                             |
| 1708638  | Food         | non-synonymous | SSP1643 | S   | hypothetical protein                                      |
| 1785389  | Food         | non-synonymous | SSP1717 | F   | phosphoribosylaminoimidazolecarboxamine formyltransferase |
| 1611892  | Natural env. | synonymous     | SSP1545 | E   | L-serine dehydratase beta subunit                         |

877

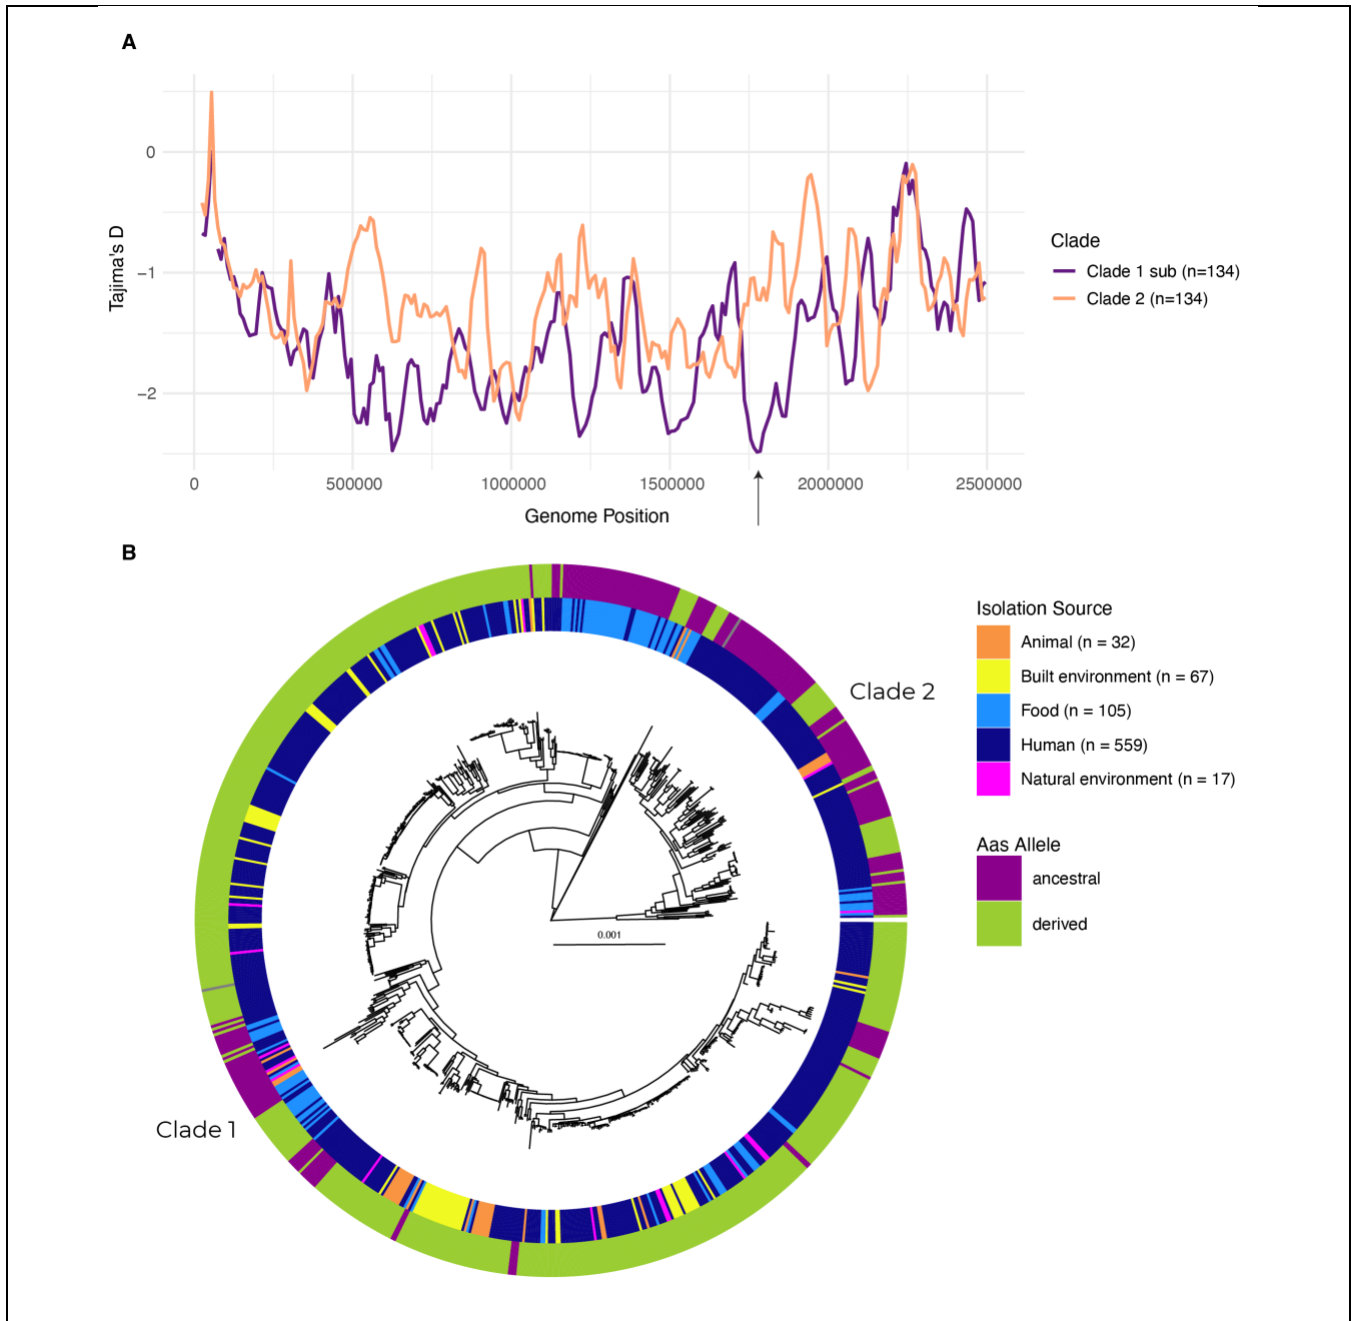

**Figure S7: Selective sweep in *aas* associated with Clade 1.** A) Tajima's D calculated in sliding windows (window size: 50,000 bp, step size: 10,000 bp) across whole genome alignments of each clade. Alignments were repeatedly (100x) sub-sampled to the size of the smaller clade (Clade 2, n=134) and the mean Tajima's D was plotted. Clade 1 has overall lower Tajima's D (-1.6) than Clade 2 (-1.2). Evidence for a previously identified selective sweep in the bifunctional adhesin-autolysin *Aas* is replicated in this larger dataset as evidenced by the dip in Tajima's D in region near 1,775,000 bp (marked by the arrow) of the Clade 1 alignment. B) Alleles of the non-synonymous variant (position 1,811,777) in *Aas* previously identified as having undergone a selective sweep are plotted on the core genome phylogeny (outer ring) alongside the isolation source (inner ring) of all genomes. *Aas* alleles are highly structured on the phylogeny with Clade 1 having a higher proportion of derived alleles (82%) than Clade 2 (28%).



878

879 **Supplementary Data 1:** Table of genomes used in this study with associated metadata.

880 **Supplementary Data 2:** Accessory genes significantly associated with each isolation source.

881
